# Supplementary material for: Nuclear genome-wide associations with mitochondrial heteroplasmy
Source: PubMed Central journal article supplement (PMC7968846; doi:10.1126/sciadv.abe7520), 2021-03-17
Supplement: supp_7_12_eabe7520__abe7520_SM.pdf [file supp_7_12_eabe7520__abe7520_SM.pdf]

[advances.sciencemag.org/cgi/content/full/7/12/eabe7520/DC1](https://advances.sciencemag.org/cgi/content/full/7/12/eabe7520/DC1)

## Supplementary Materials for

### **Nuclear genome-wide associations with mitochondrial heteroplasmy**

Priyanka Nandakumar, Chao Tian, Jared O'Connell, 23andMe Research Team, David Hinds\*,  
Andrew D. Paterson, Neal Sondheimer\*

\*Corresponding author. Email: [neal.sondheimer@sickkids.ca](mailto:neal.sondheimer@sickkids.ca) (N.S.); [dhinds@23andme.com](mailto:dhinds@23andme.com) (D.H.)

Published 17 March 2021, *Sci. Adv.* **7**, eabe7520 (2021)  
DOI: 10.1126/sciadv.abe7520

#### **This PDF file includes:**

Members of the 23andMe Research Team  
Figs. S1 to S5  
Tables S1 to S6

**Members of the 23andMe Research Team** are: Michelle Agee, Stella Aslibekyan, Adam Auton, Elizabeth Babalola, Robert K. Bell, Jessica Bielenberg, Katarzyna Bryc, Emily Bullis, Briana Cameron, Daniella Coker, Gabriel Cuellar Partida, Devika Dhamija, Sayantan Das, Sarah L. Elson, Teresa Filshtein, Kipper Fletez-Brant, Pierre Fontanillas, Will Freyman, Pooja M. Gandhi, Karl Heilbron, Barry Hicks, Karen E. Huber, Ethan M. Jewett, Yunxuan Jiang, Aaron Kleinman, Katelyn Kukar, Keng-Han Lin, Maya Lowe, Marie K. Luff, Jennifer C. McCreight, Matthew H. McIntyre, Kimberly F. McManus, Steven J. Micheletti, Meghan E. Moreno, Joanna L. Mountain, Sahar V. Mozaffari, Elizabeth S. Noblin, Aaron A. Petrakovitz, G. David Poznik, Anjali J. Shastri, Janie F. Shelton, Jingchunzi Shi, Suyash Shringarpure, Vinh Tran, Joyce Y. Tung, Xin Wang, Wei Wang, Catherine H. Weldon, and Peter Wilton.

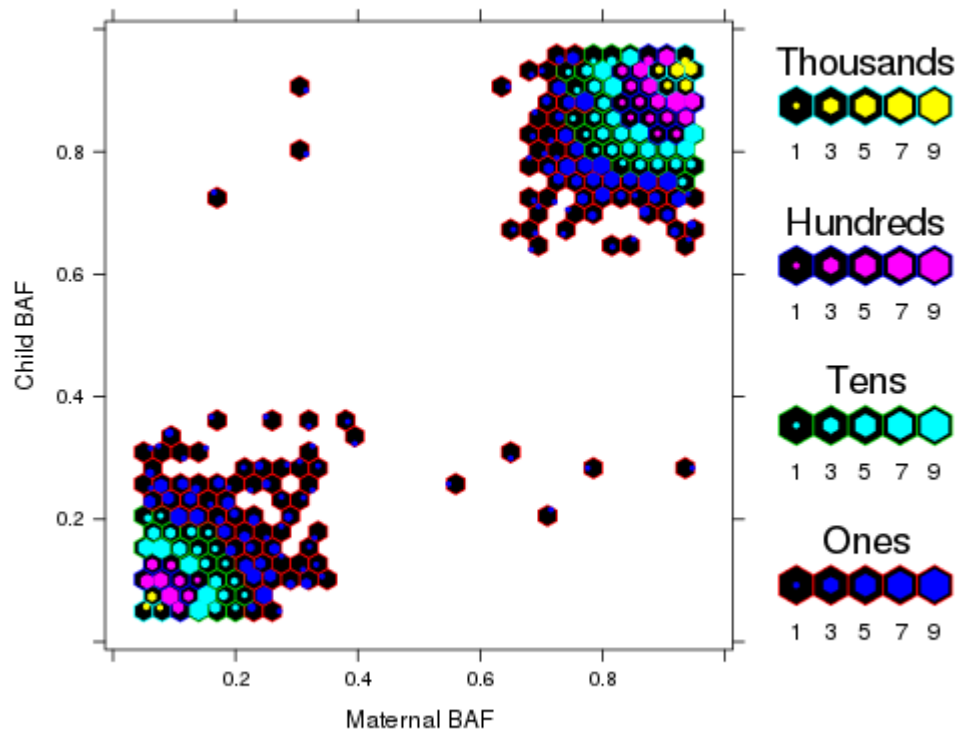

**Fig. S1.**

All heteroplasmic positions, where both the mother had >5% MtHz, are shown, plotted by both maternal and child BAF showing the predicted concordance of MtHz between mother and child.

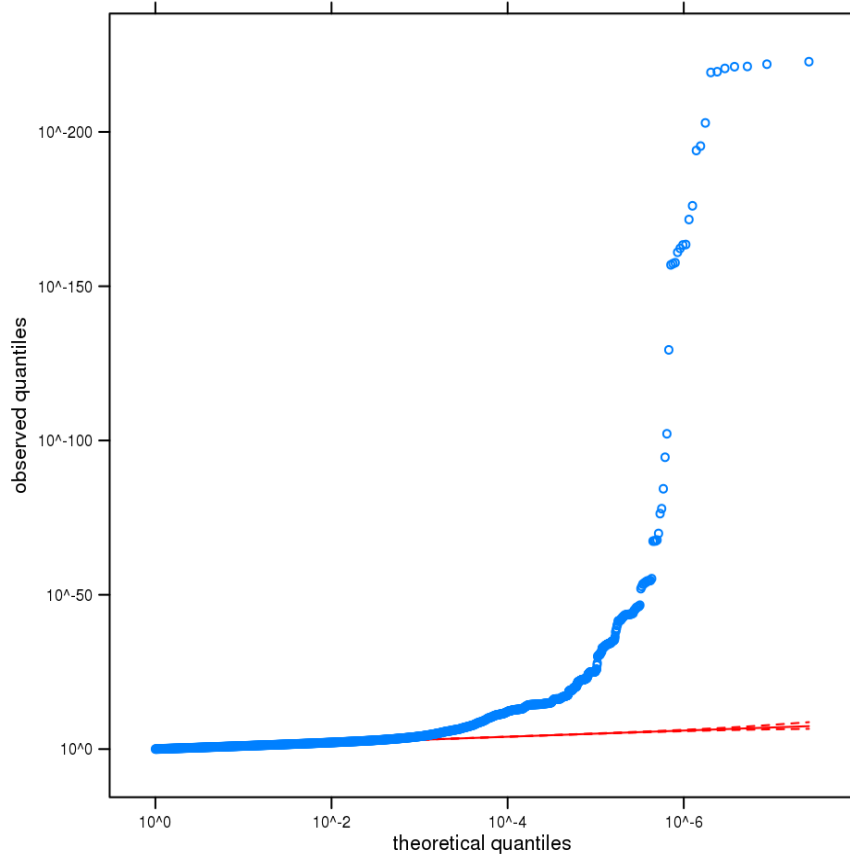

**Fig. S2.**

QQ plot. Red line indicates the null of no association. SNP association results presented in Table 3 are adjusted for  $\lambda=1.077$

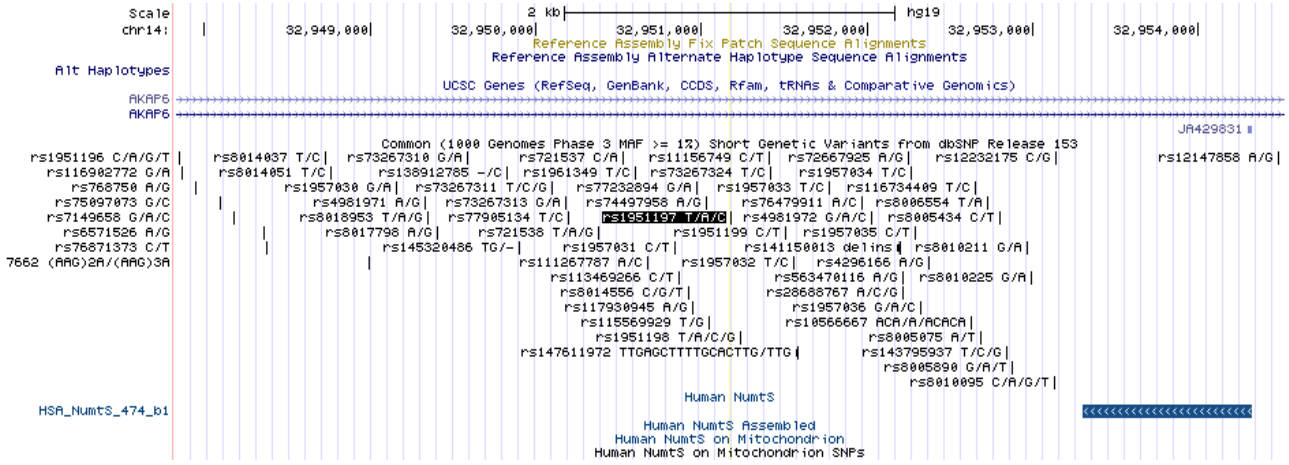

**Fig. S3.**

NUMT 474 overlap of rs1951197. The peak of association within AKAP6 lies within an intron that contains NUMT 474. View is from UCSC Genome Browser hg19.

**Figure S4** – The following pages show the regional association plots for the 20 peak loci.

### 3.1 rs1049432: [TFAM]

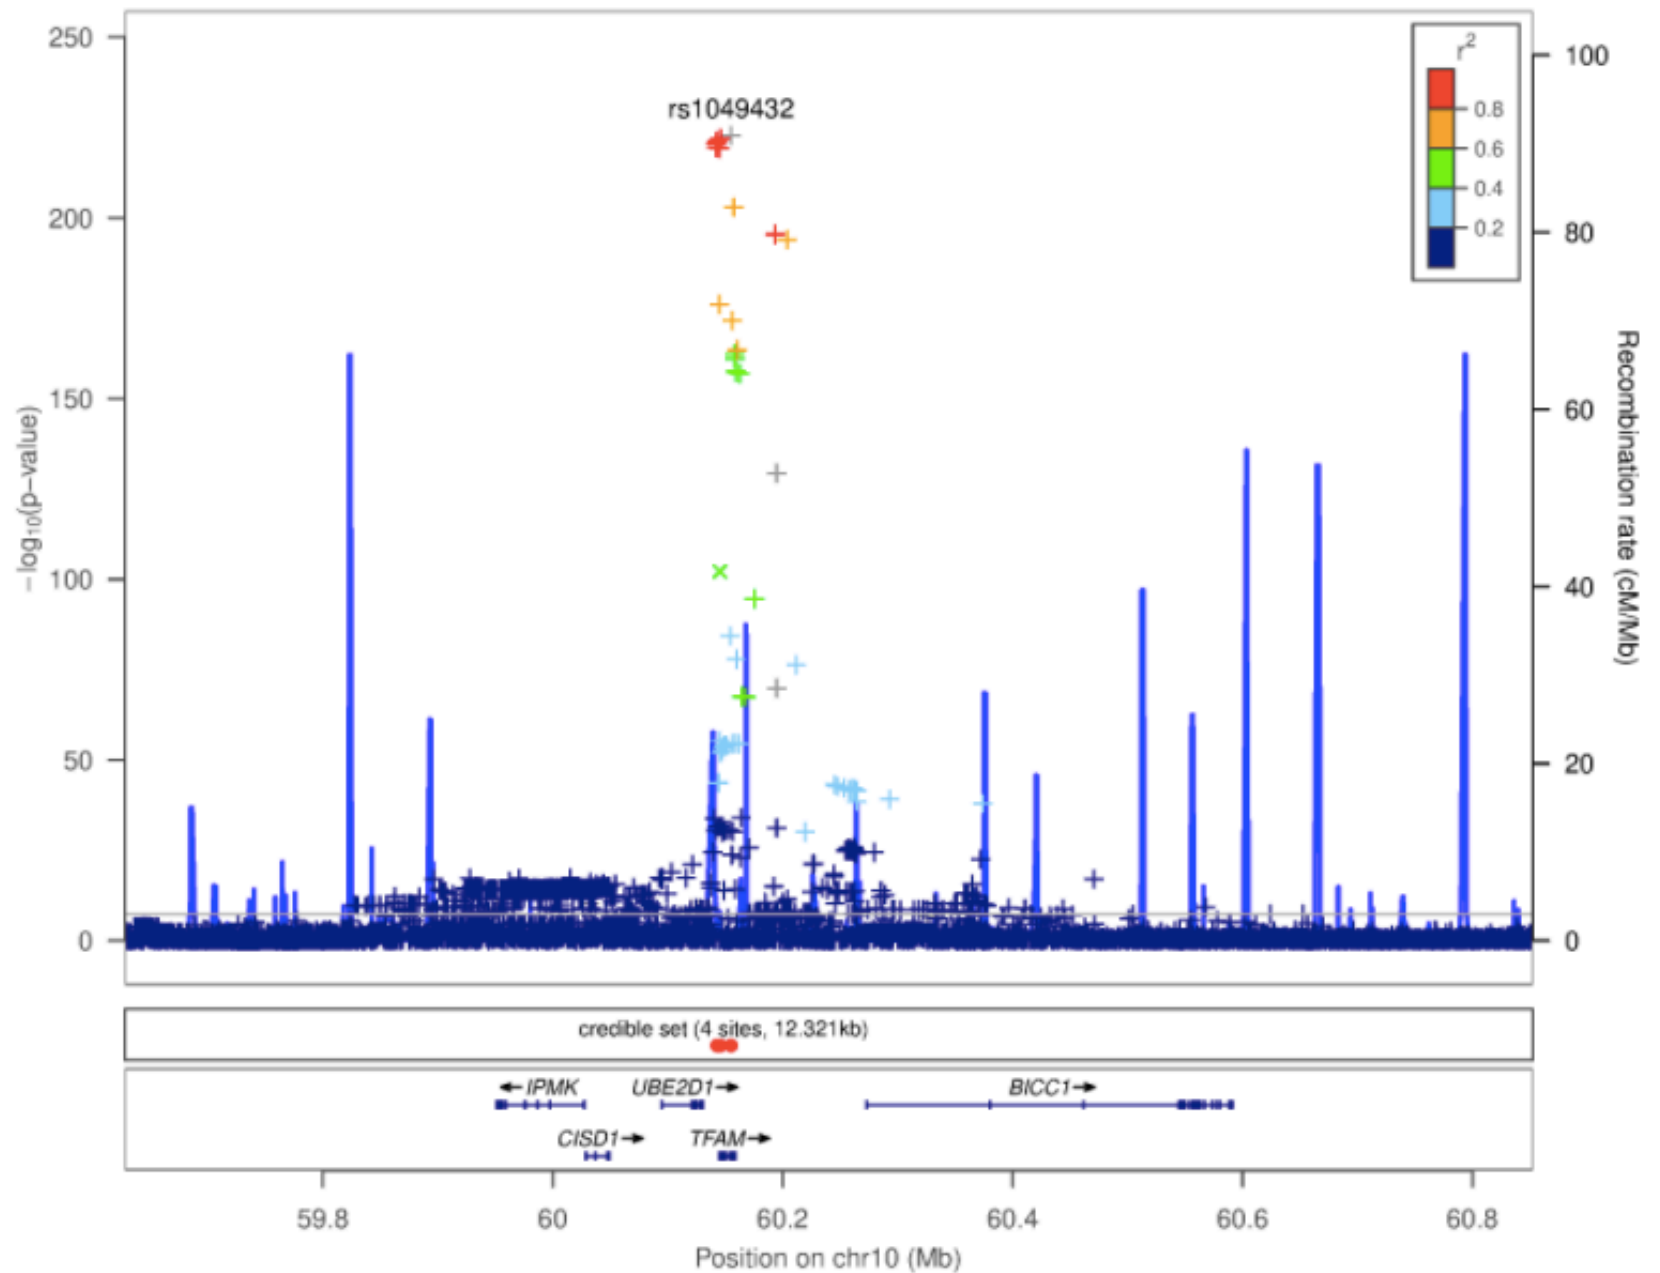

### 3.5 rs28539606: HLA-DQA1–[HLA-DQB1

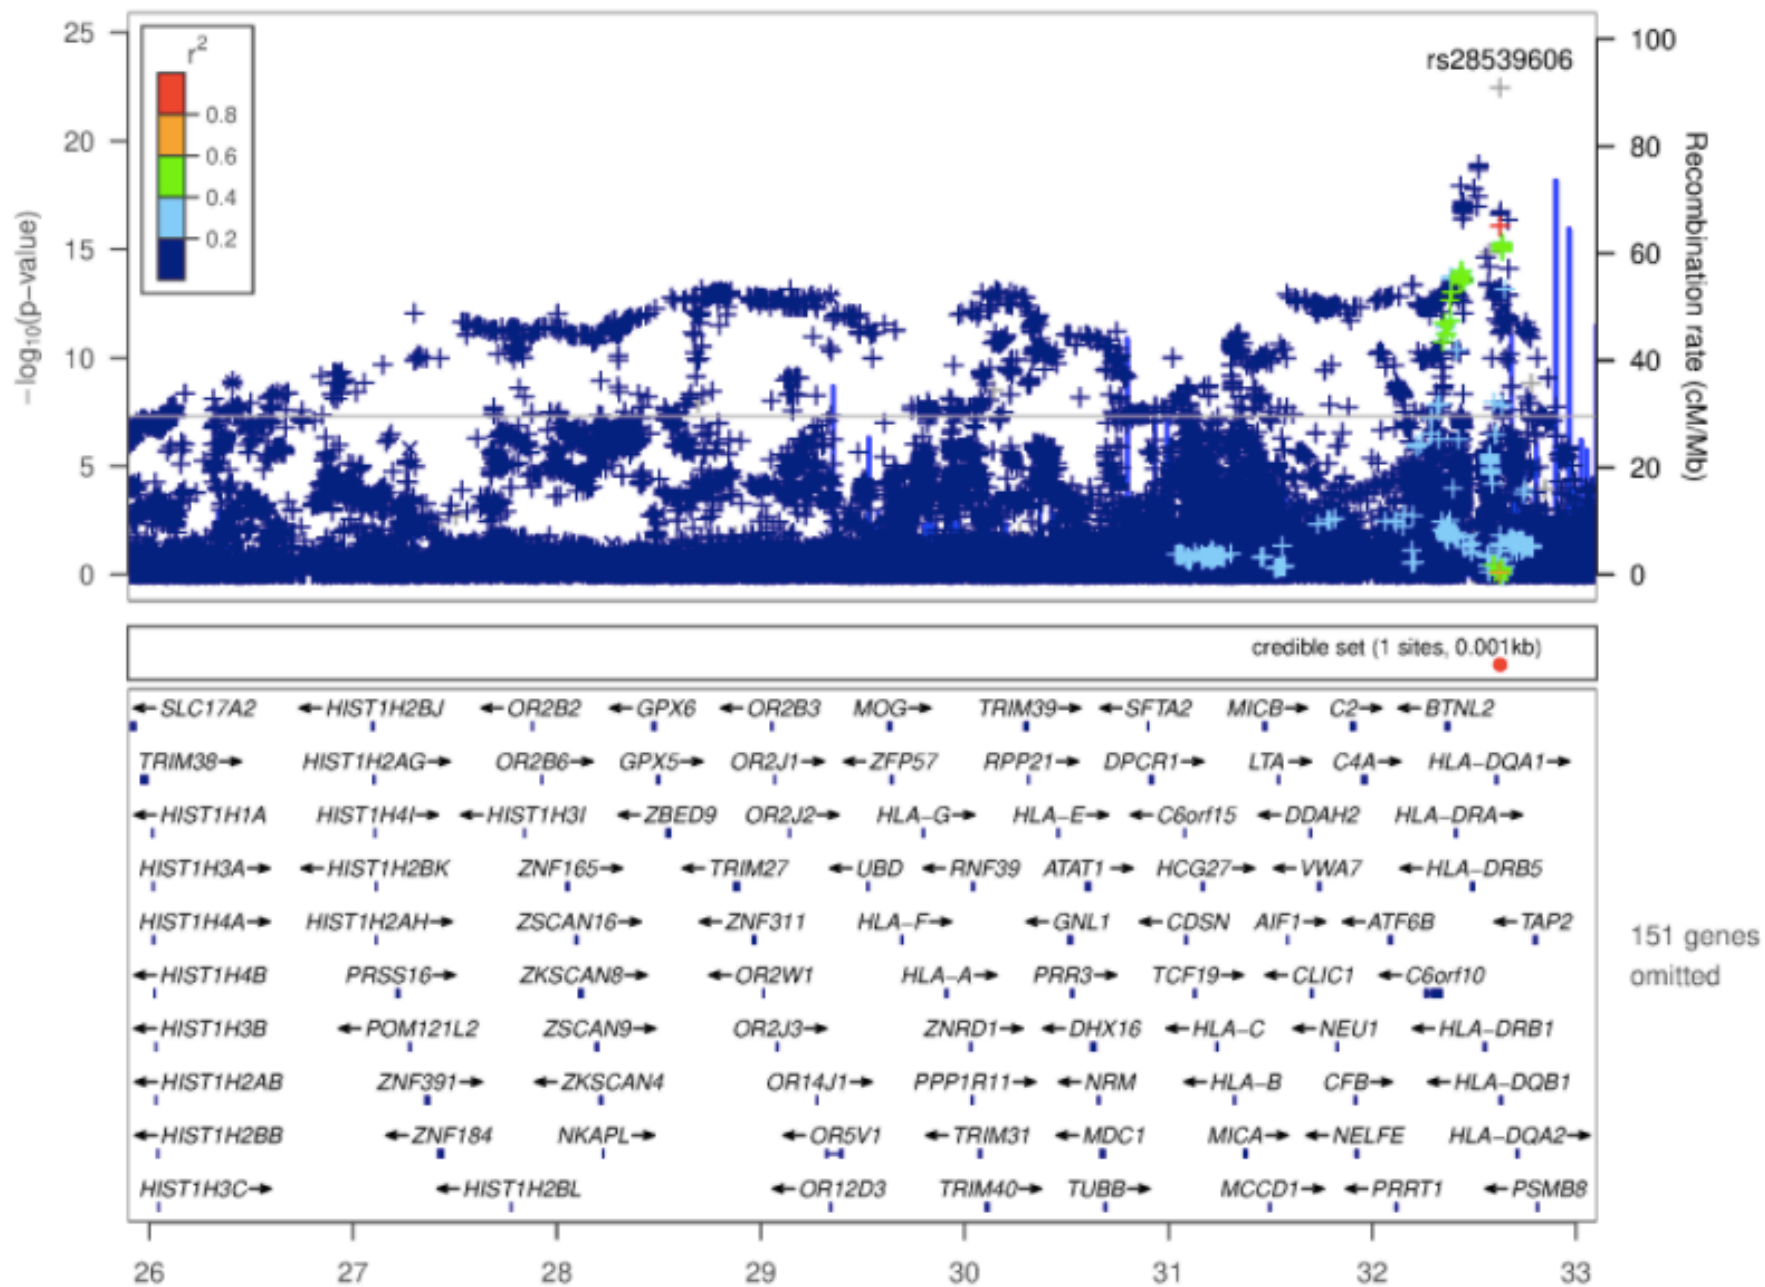



### 3.9 rs4251979: [IL1RN]

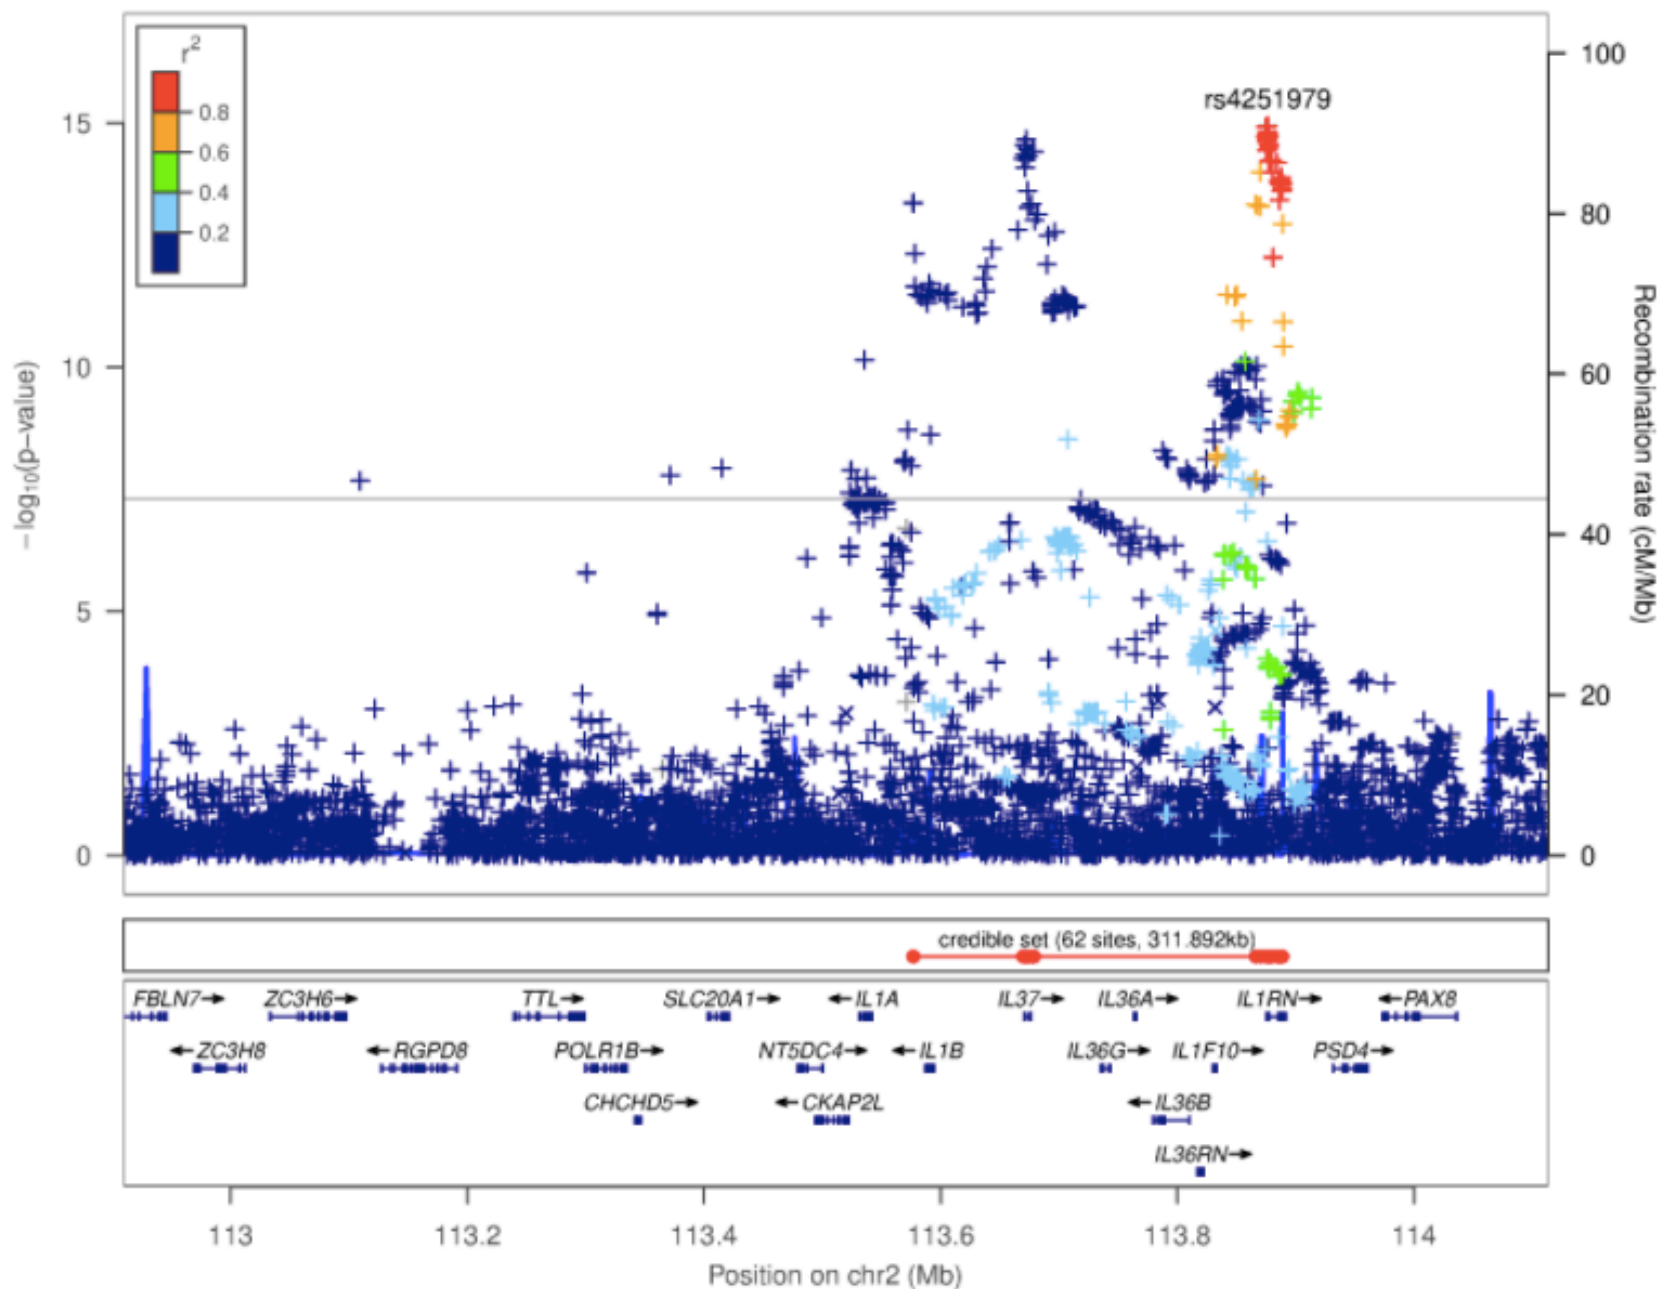

### 3.12 rs73081554: [RPP14,RP11-80H18.3]

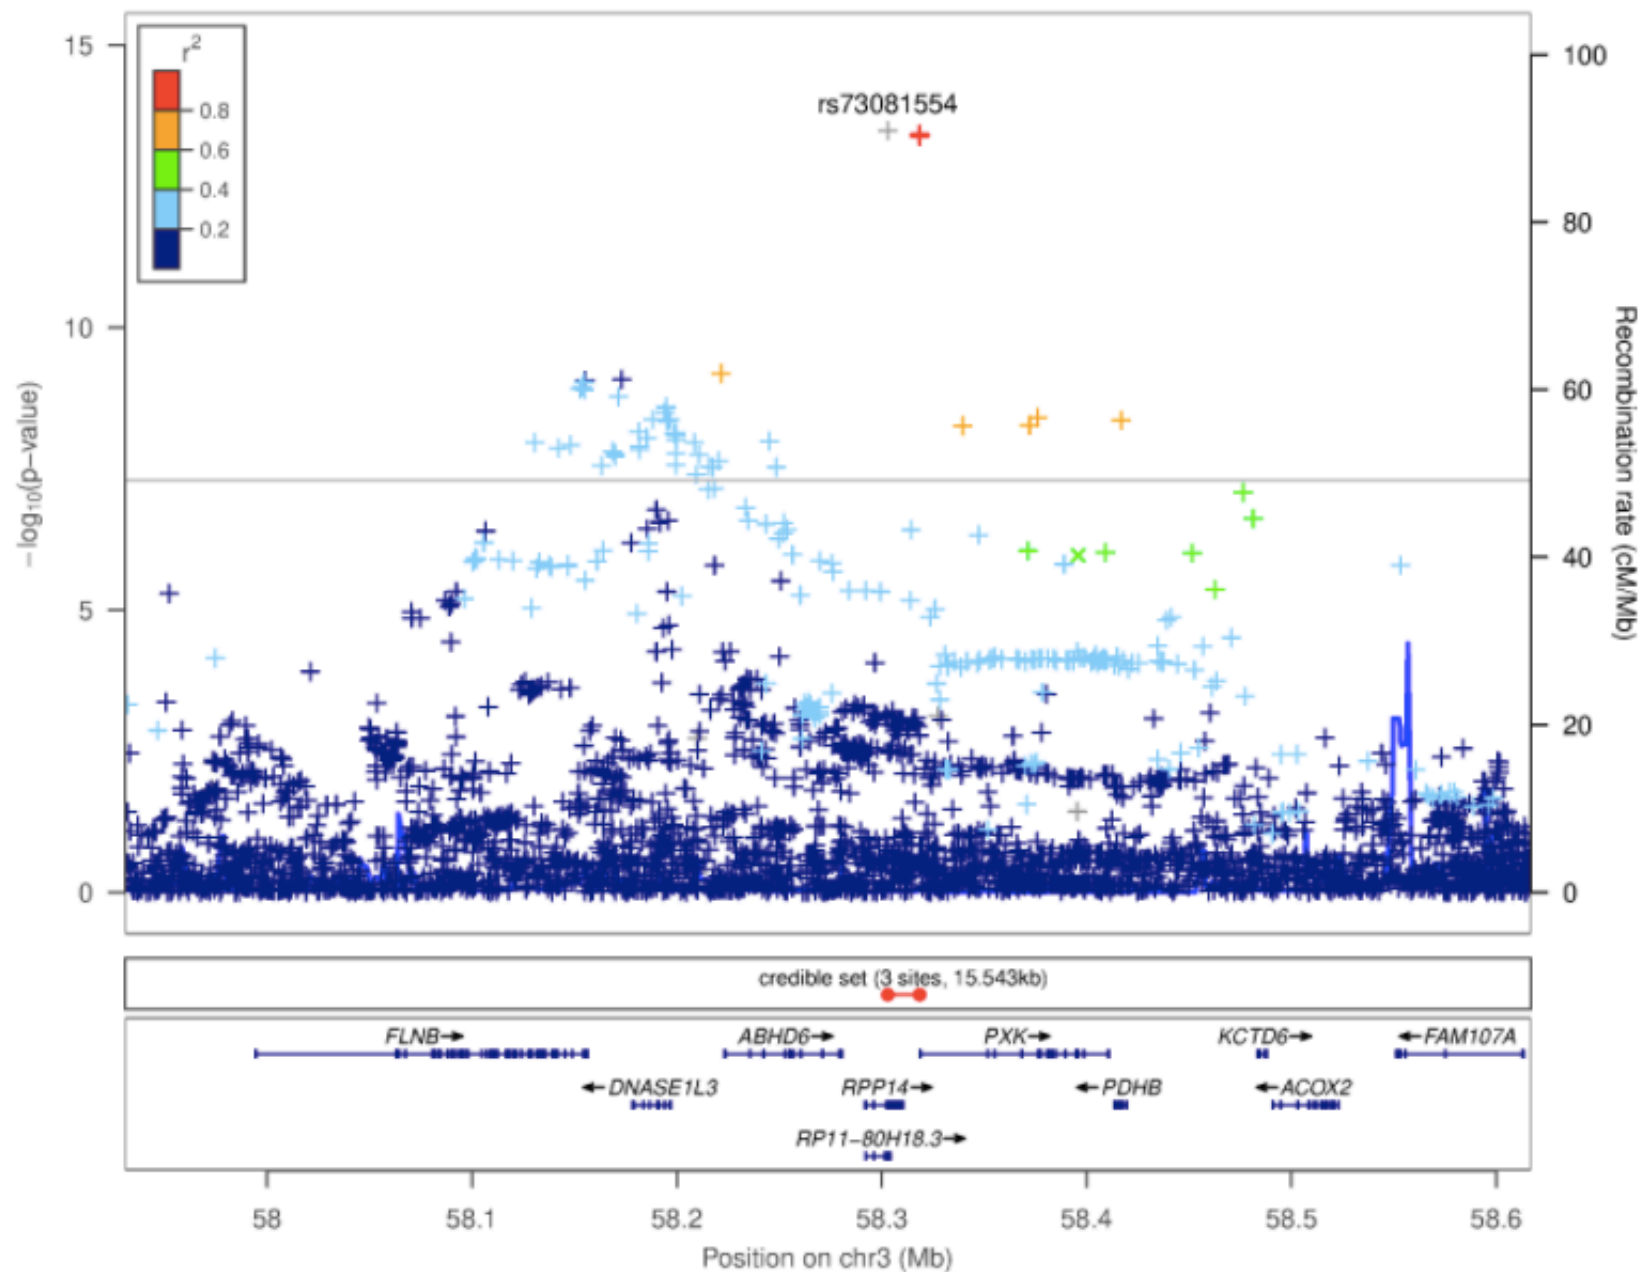

### 3.14 rs12461806: ZNRF4-□-TINCR

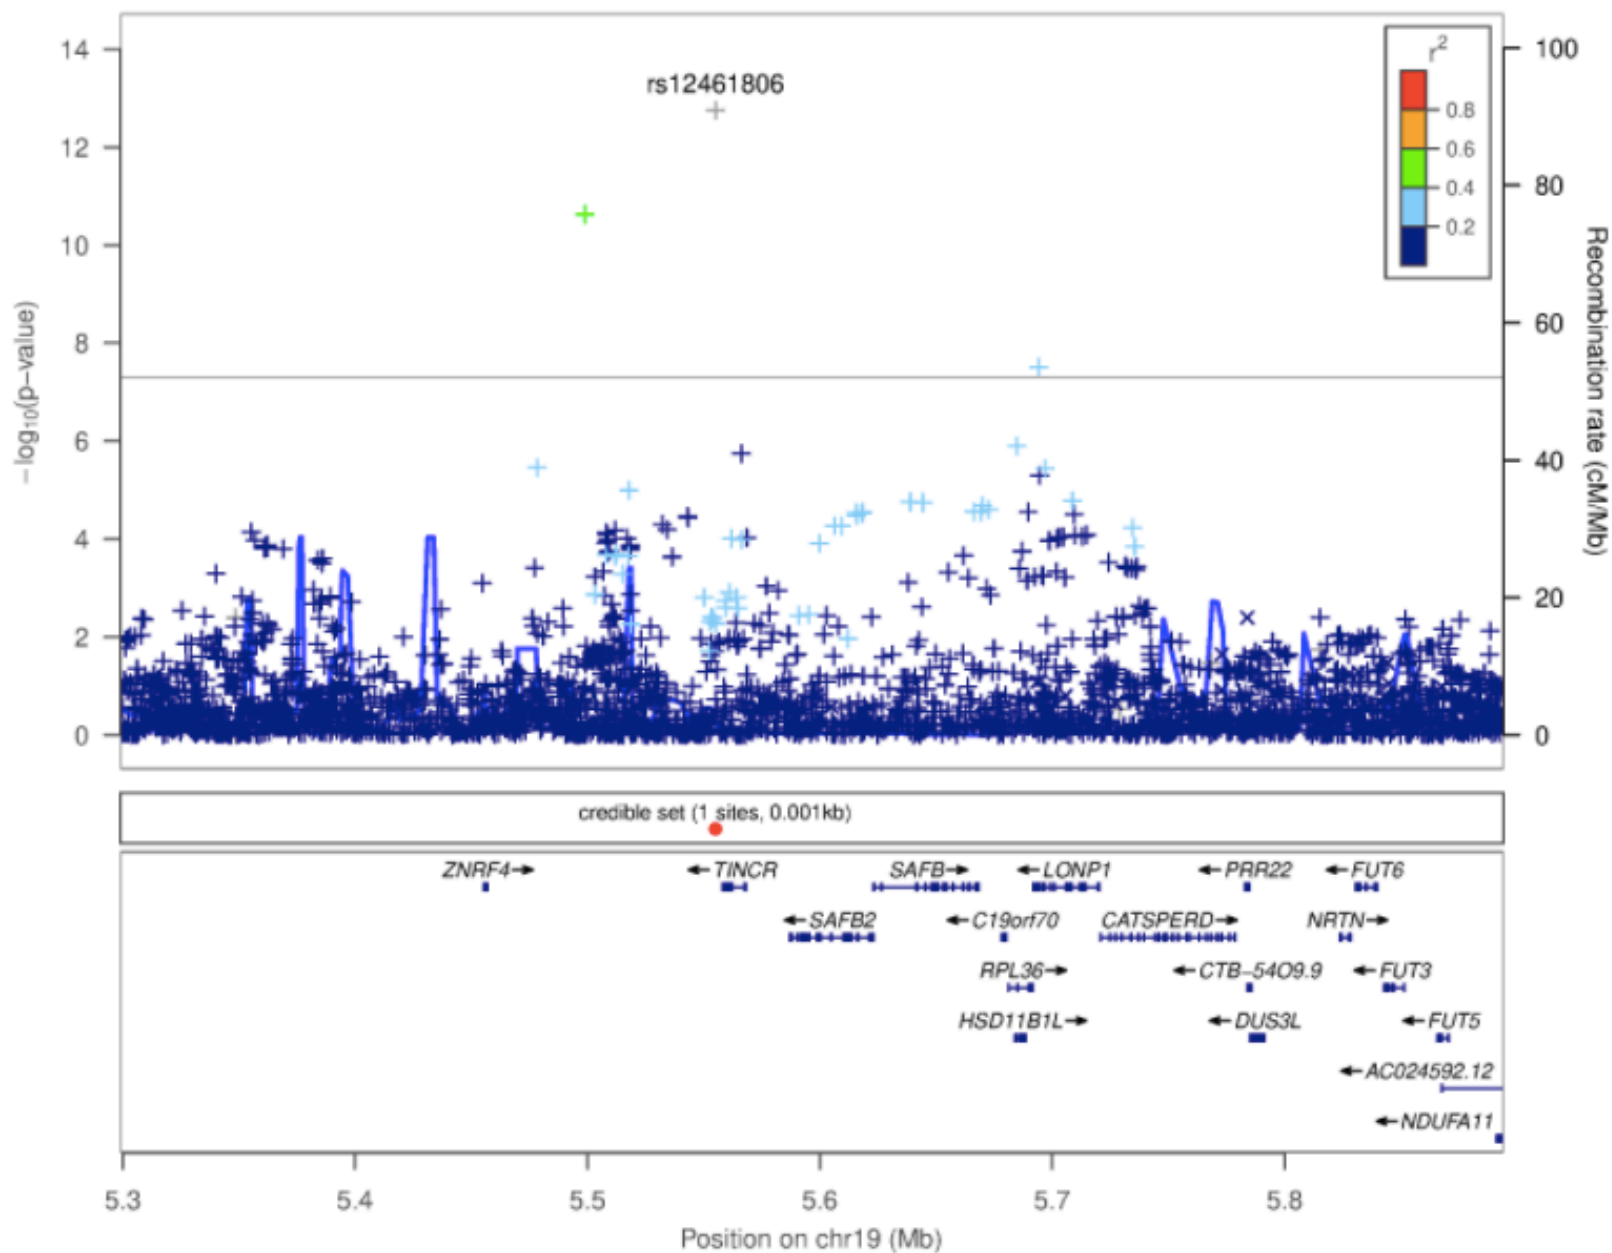

### 3.16 rs370209610: [IFNL4]

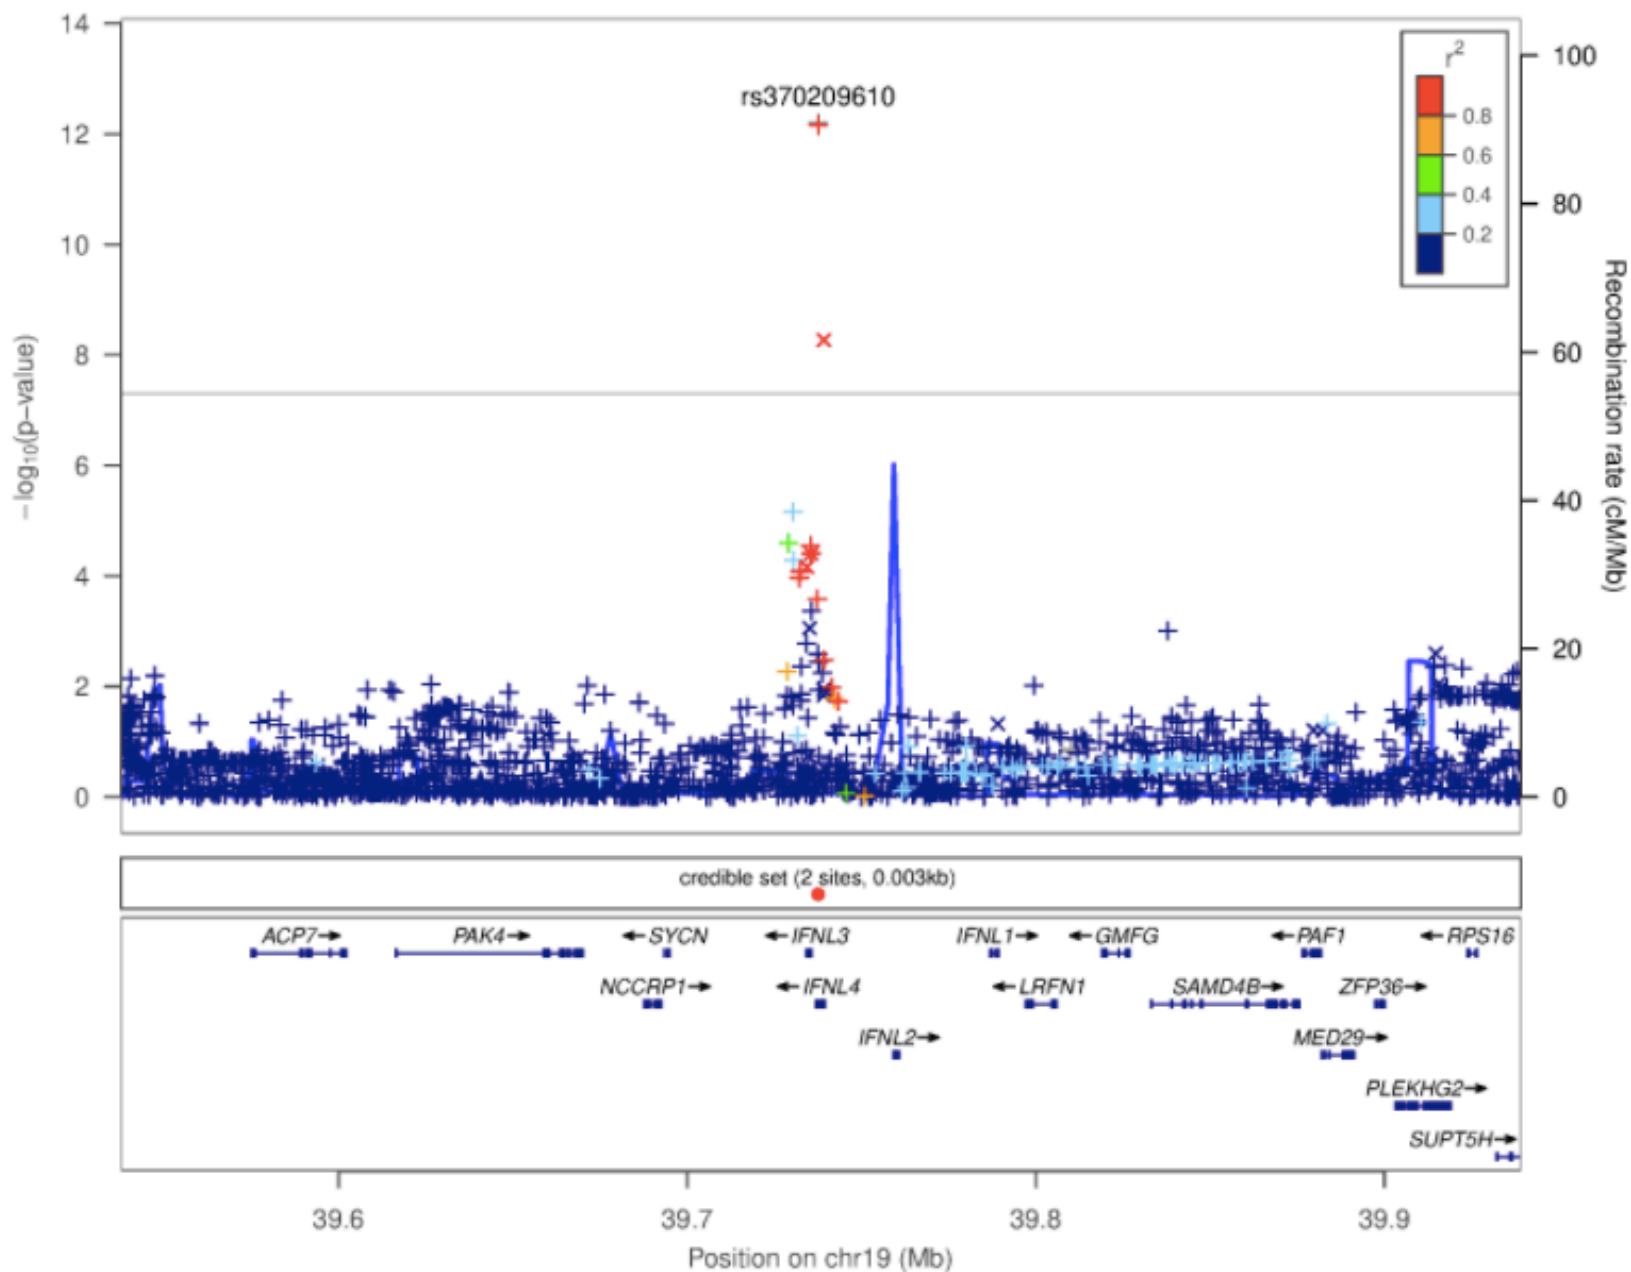

### 3.17 rs58678340: [LZTS2]

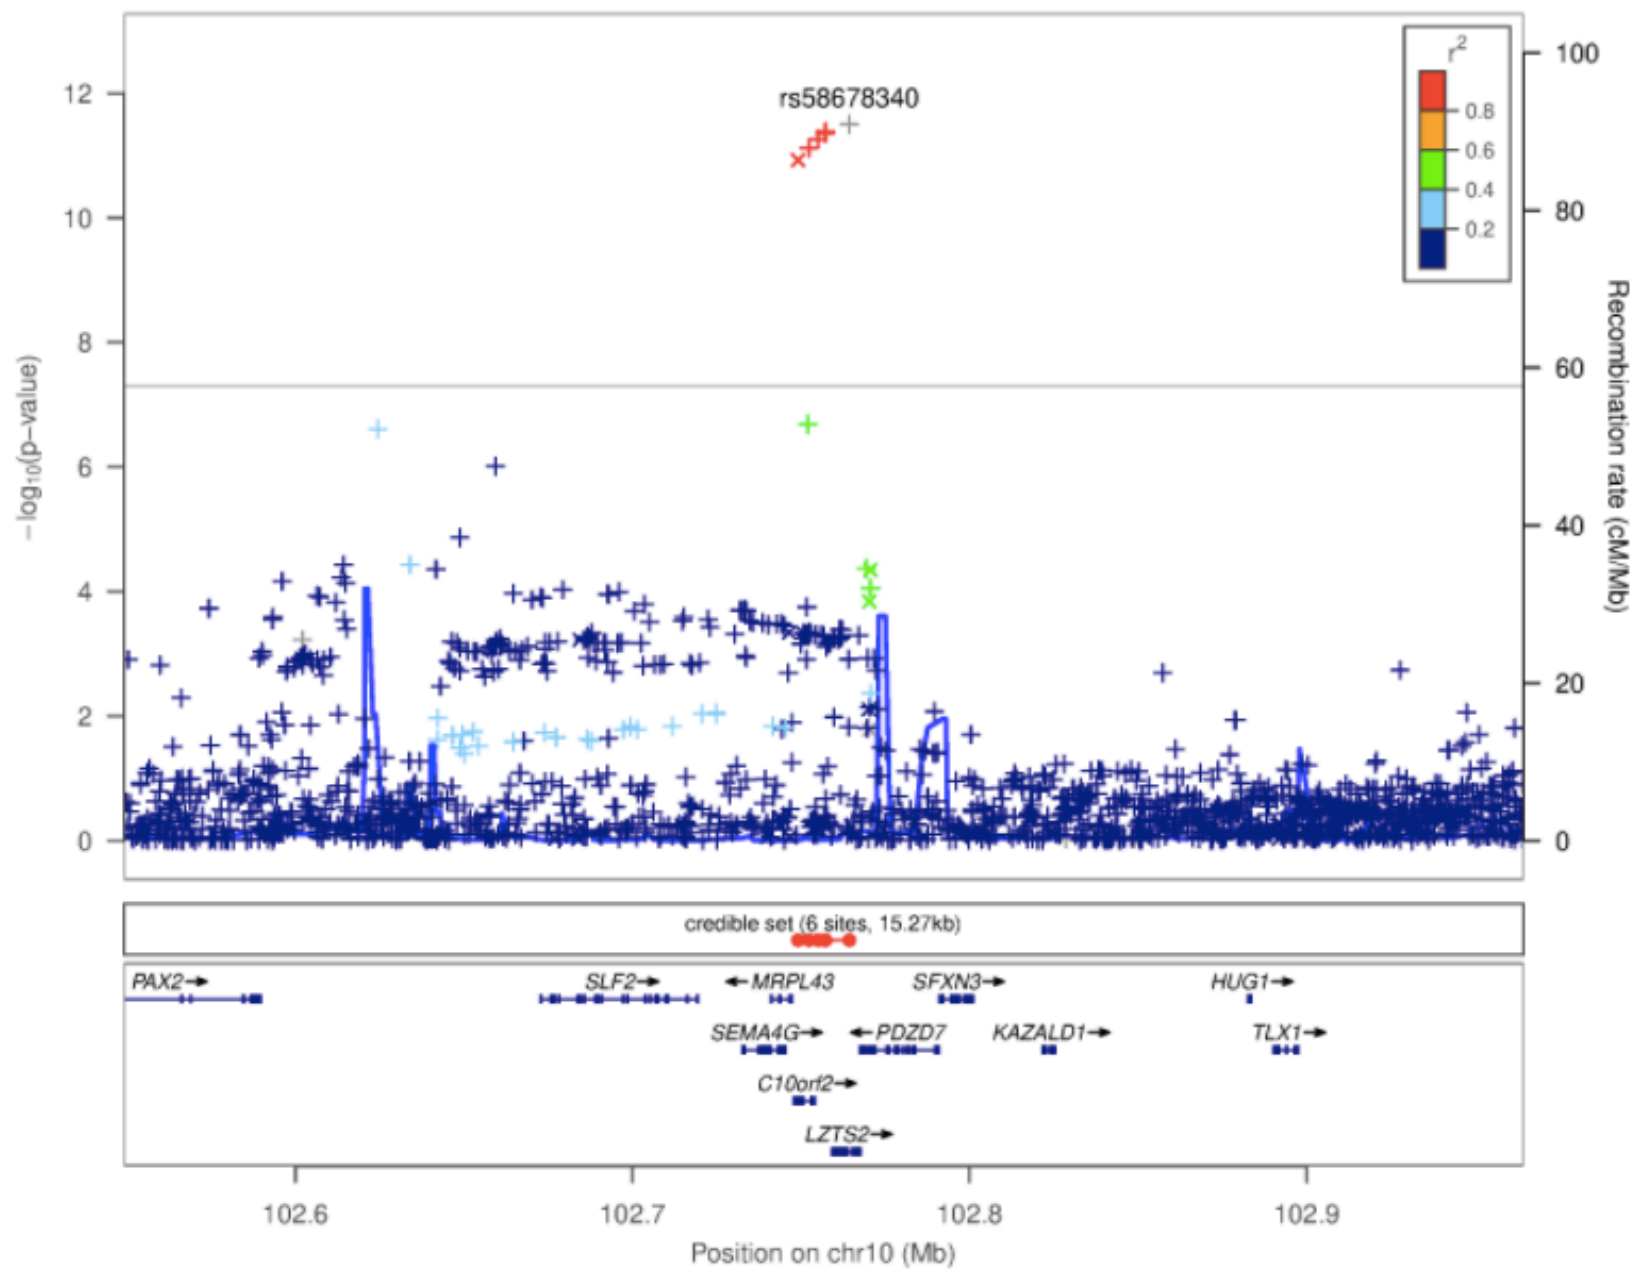

### 3.18 rs200605061:GTCAA: WDR72- $\square$ —UNC13C

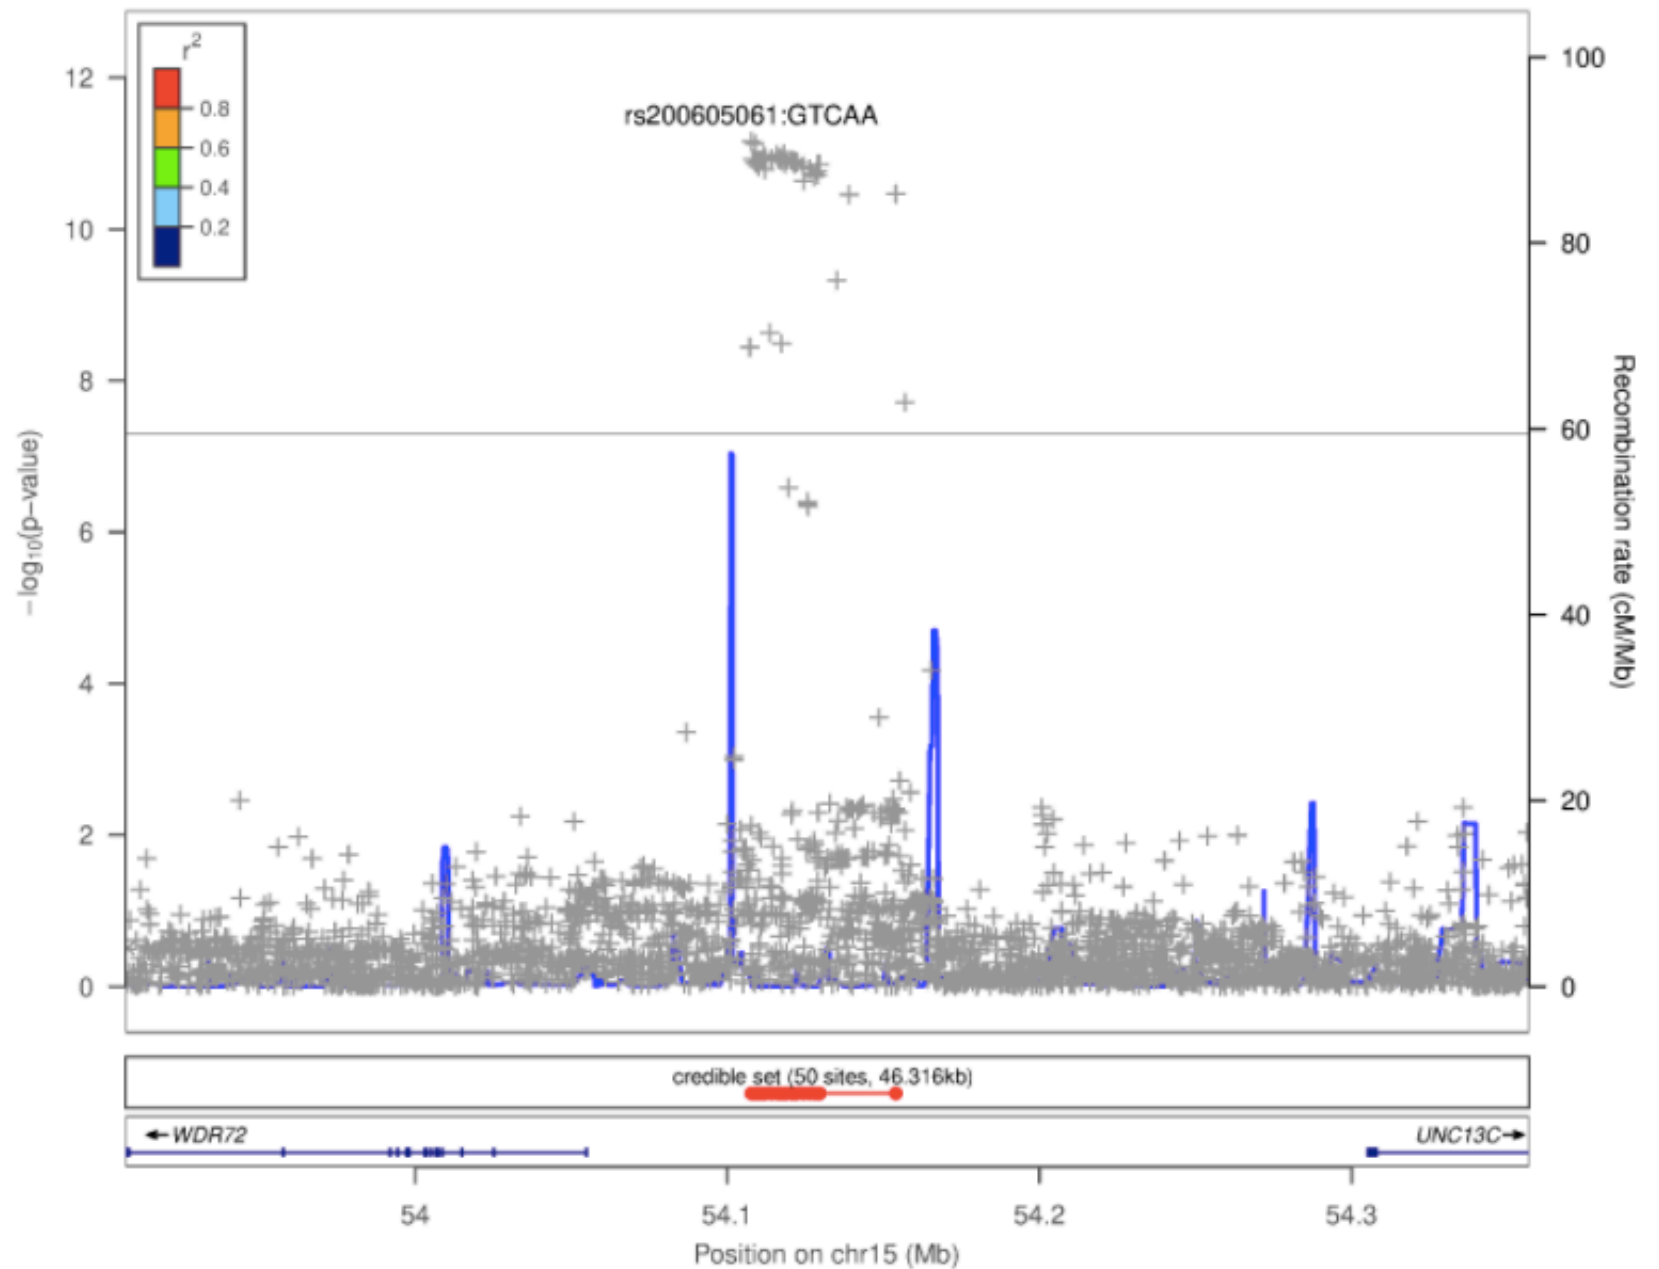

### 3.19 rs7319964: KLF5-□-KLF12

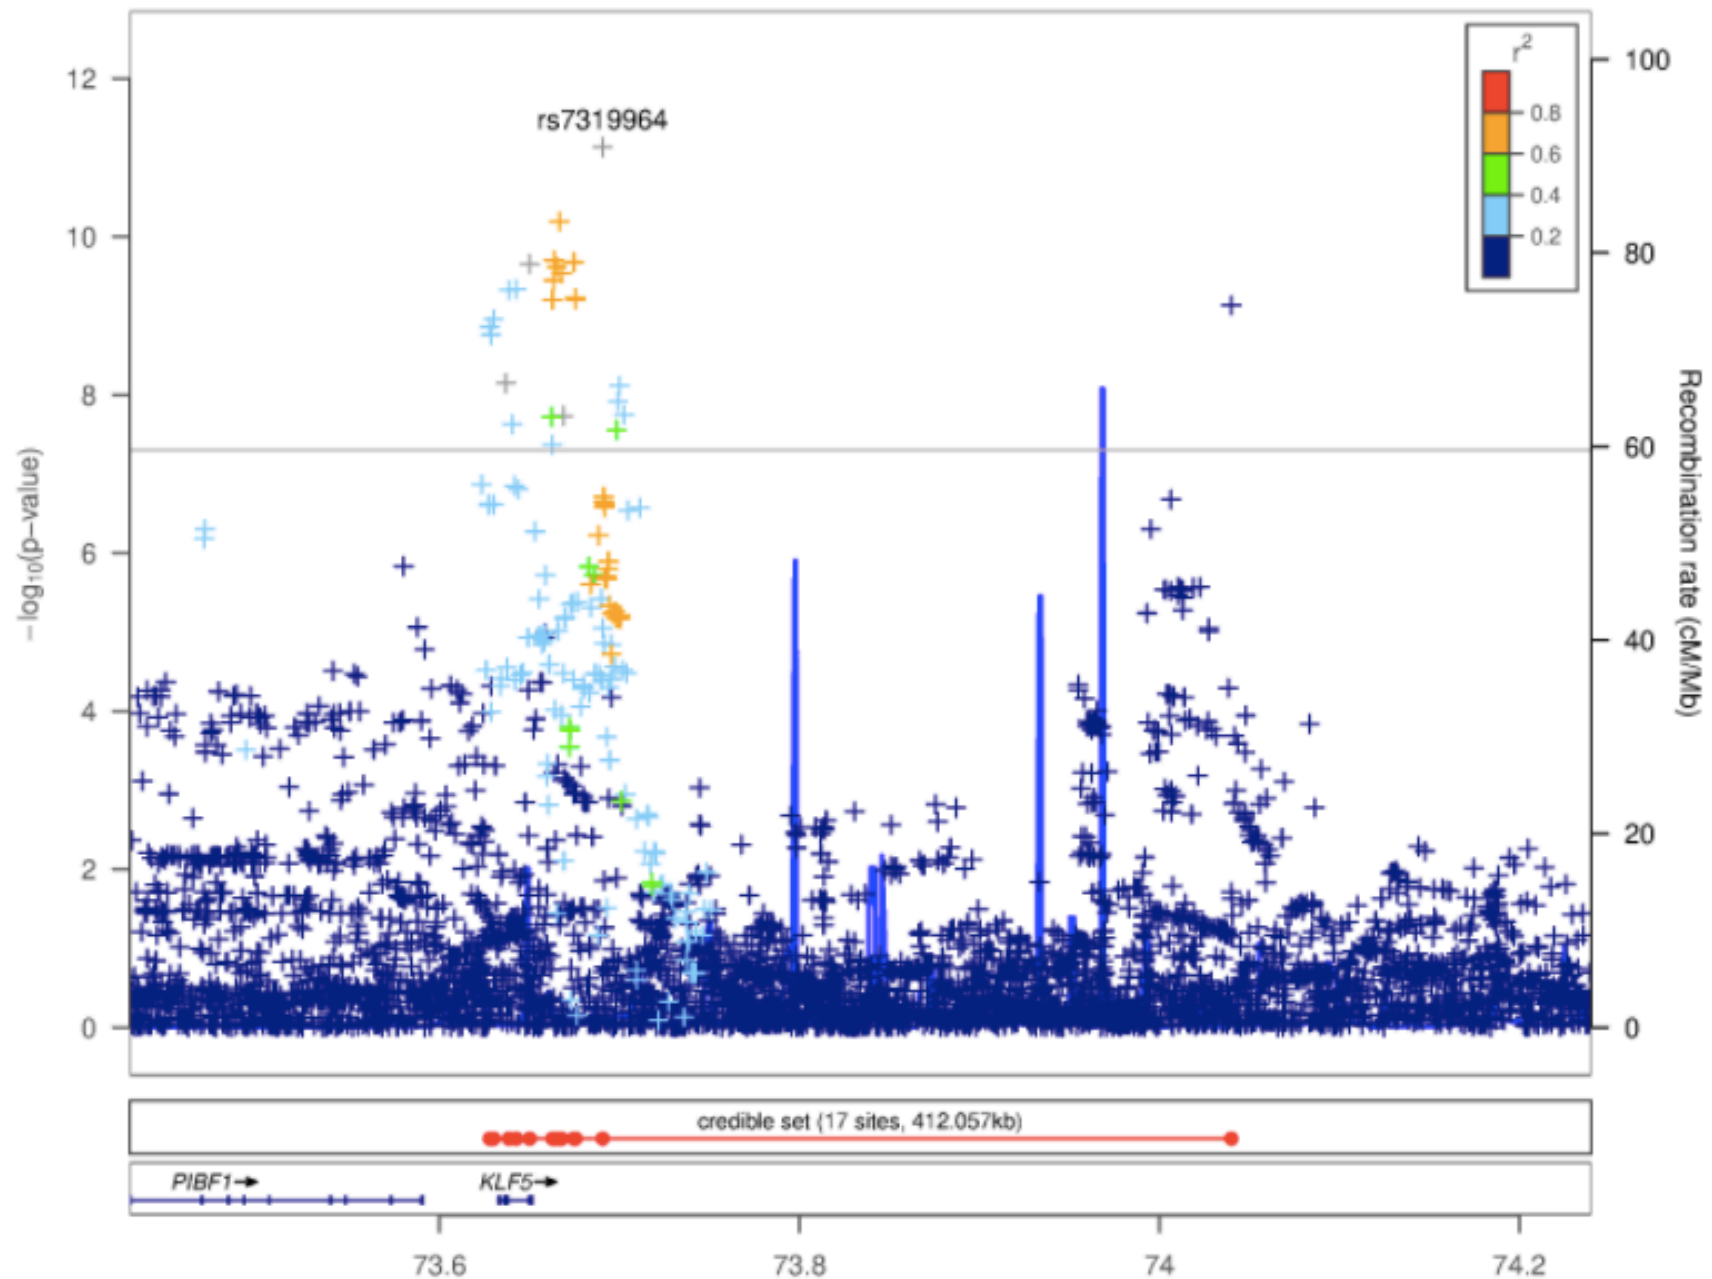



## 3.22 rs2149642: BMP2—□—HAO1

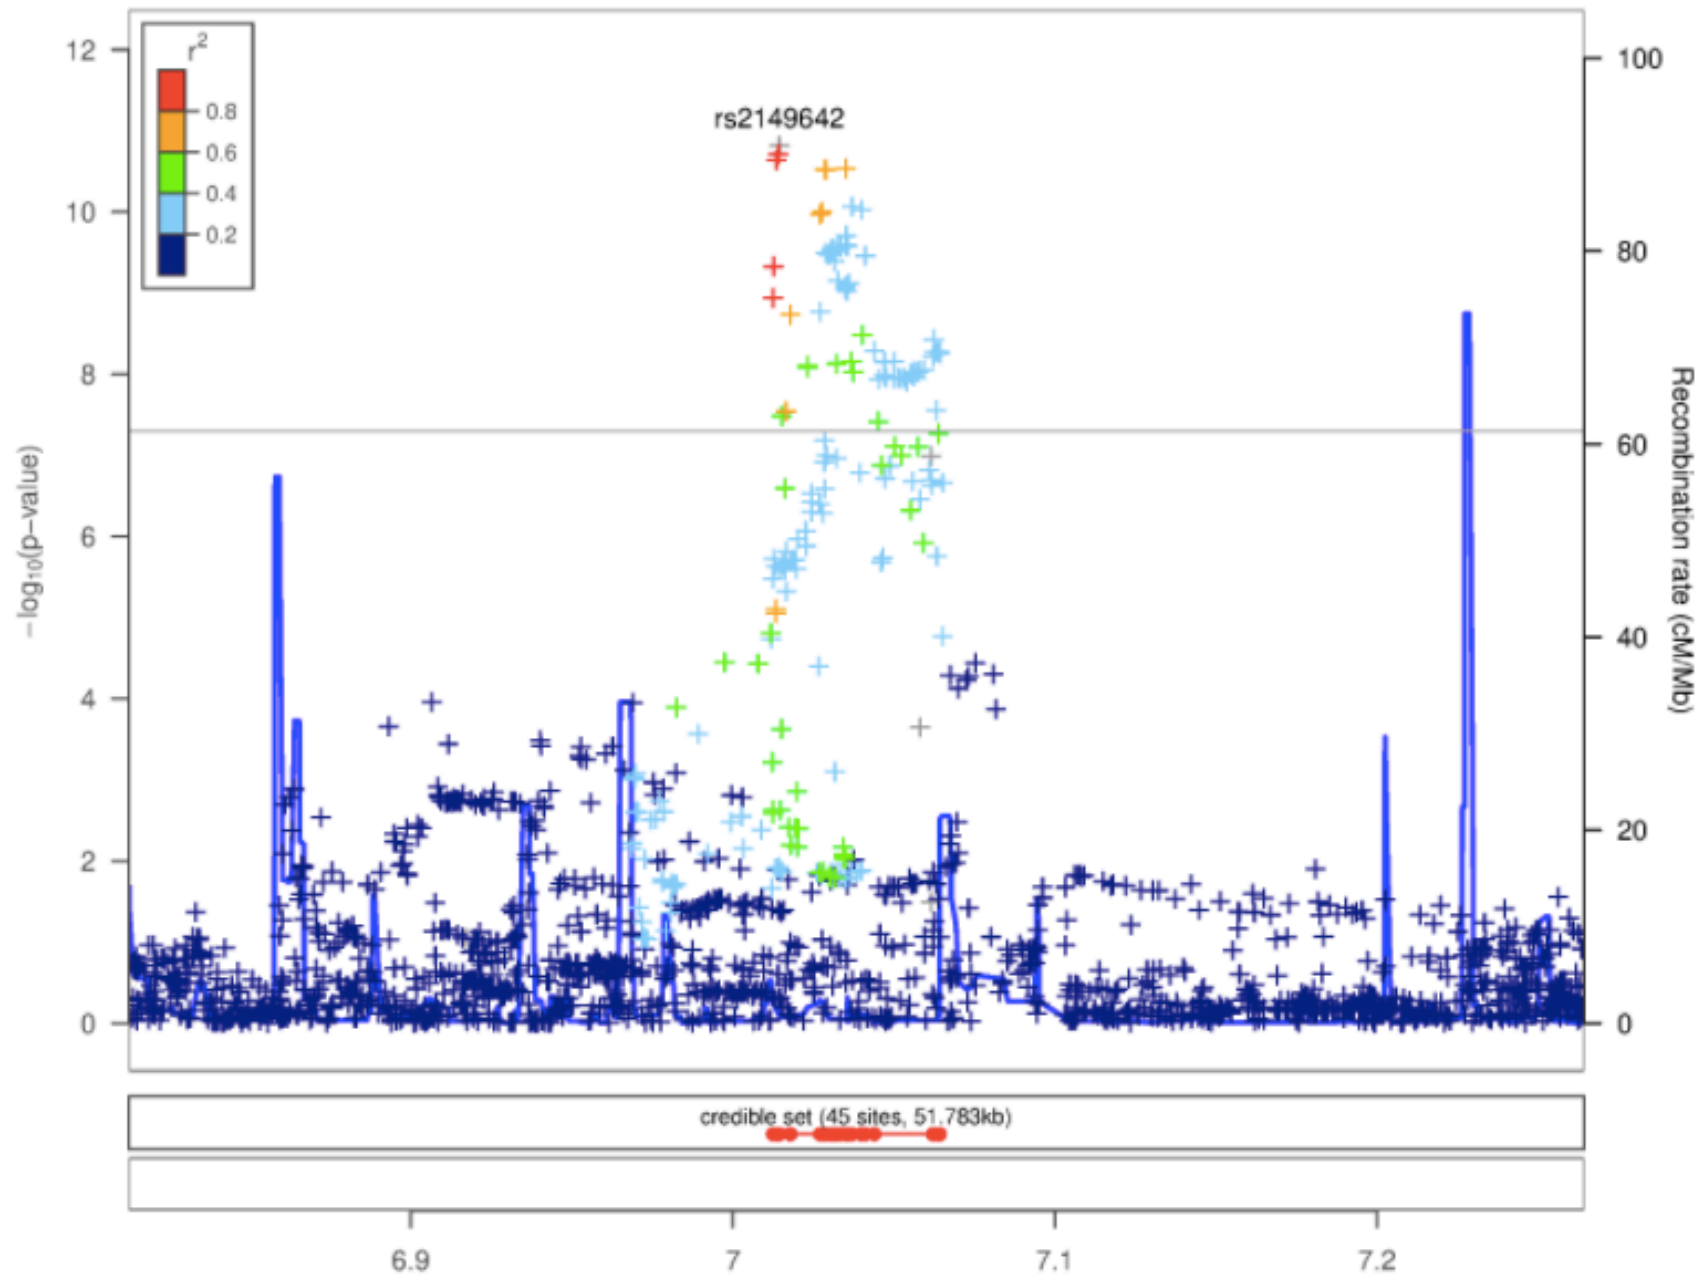



### 3.23 rs143803034: CCZ1B- $\square$ -C1GALT1

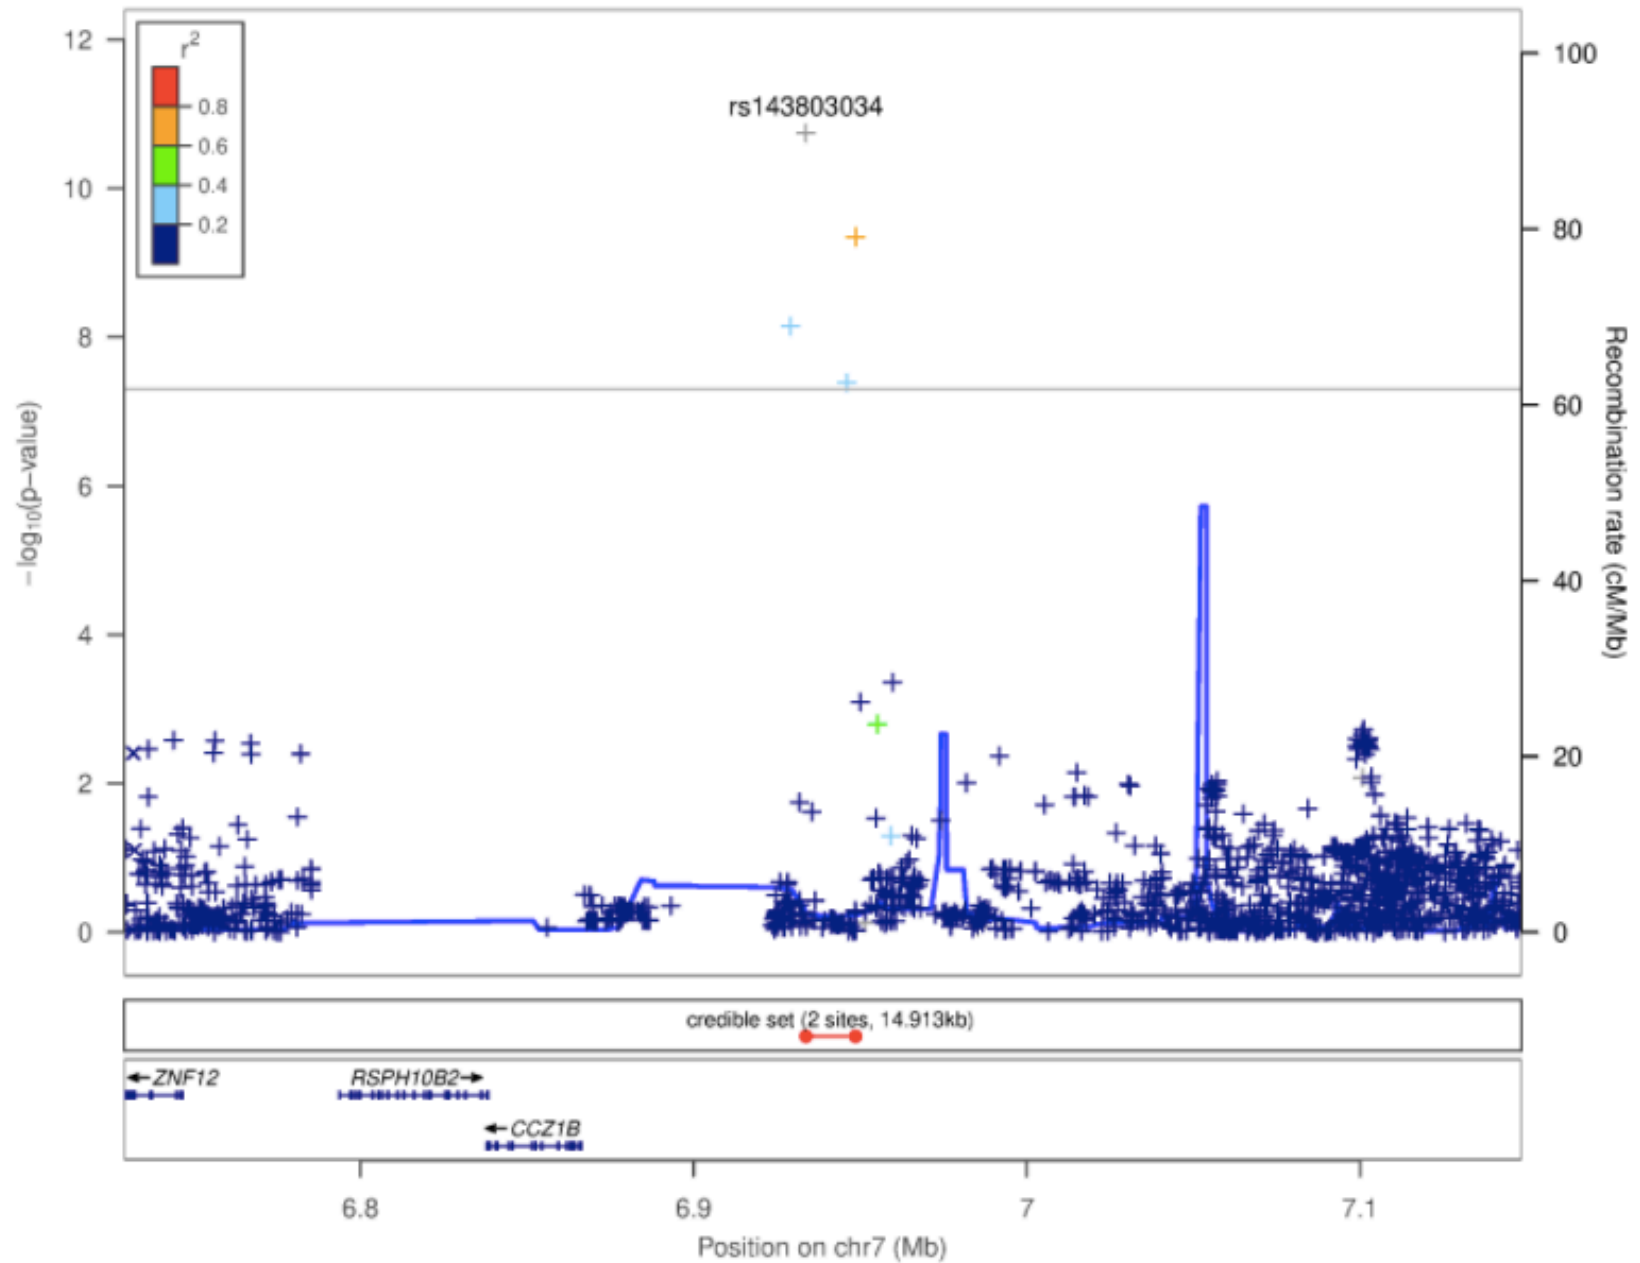

### 3.25 rs10063311: FST-NDUFS4

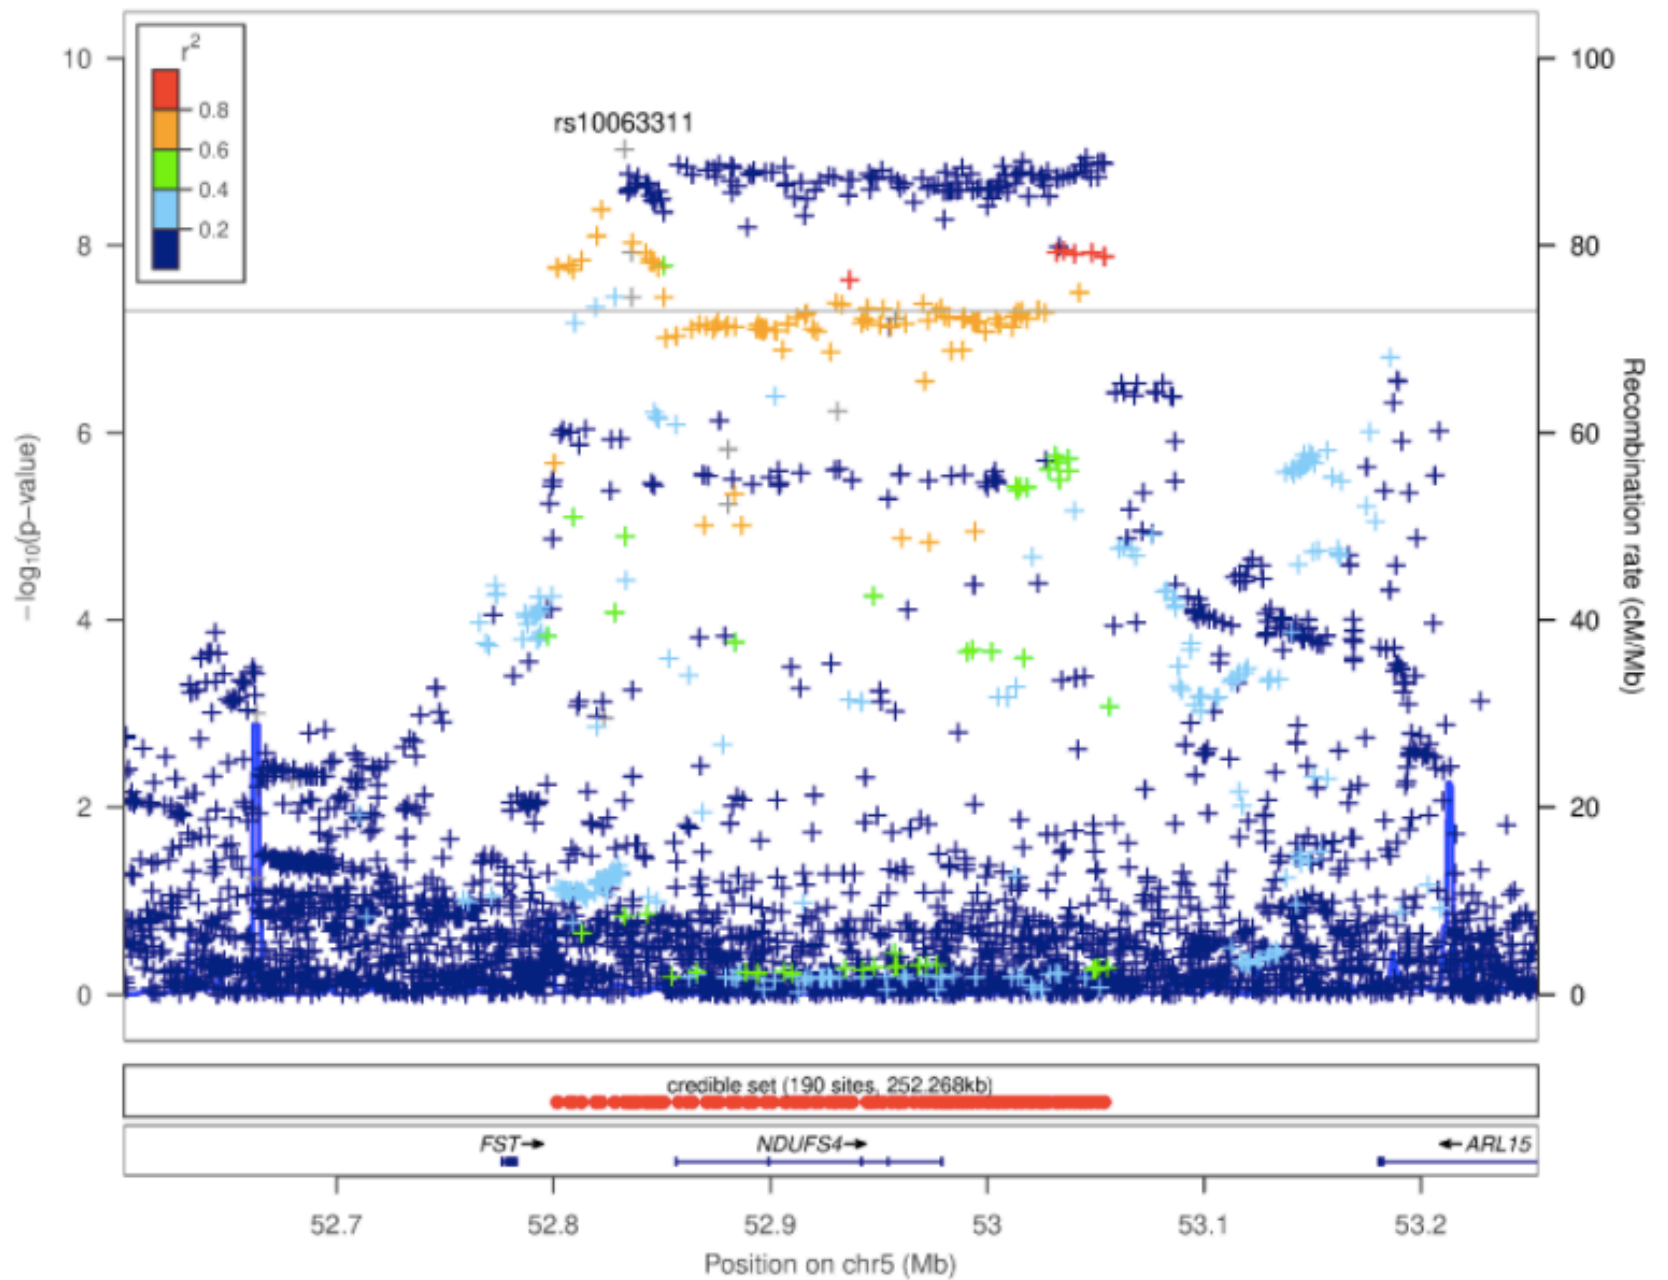

### 3.26 rs145232625: IGKV3OR2-268 — □ — PLGLB2

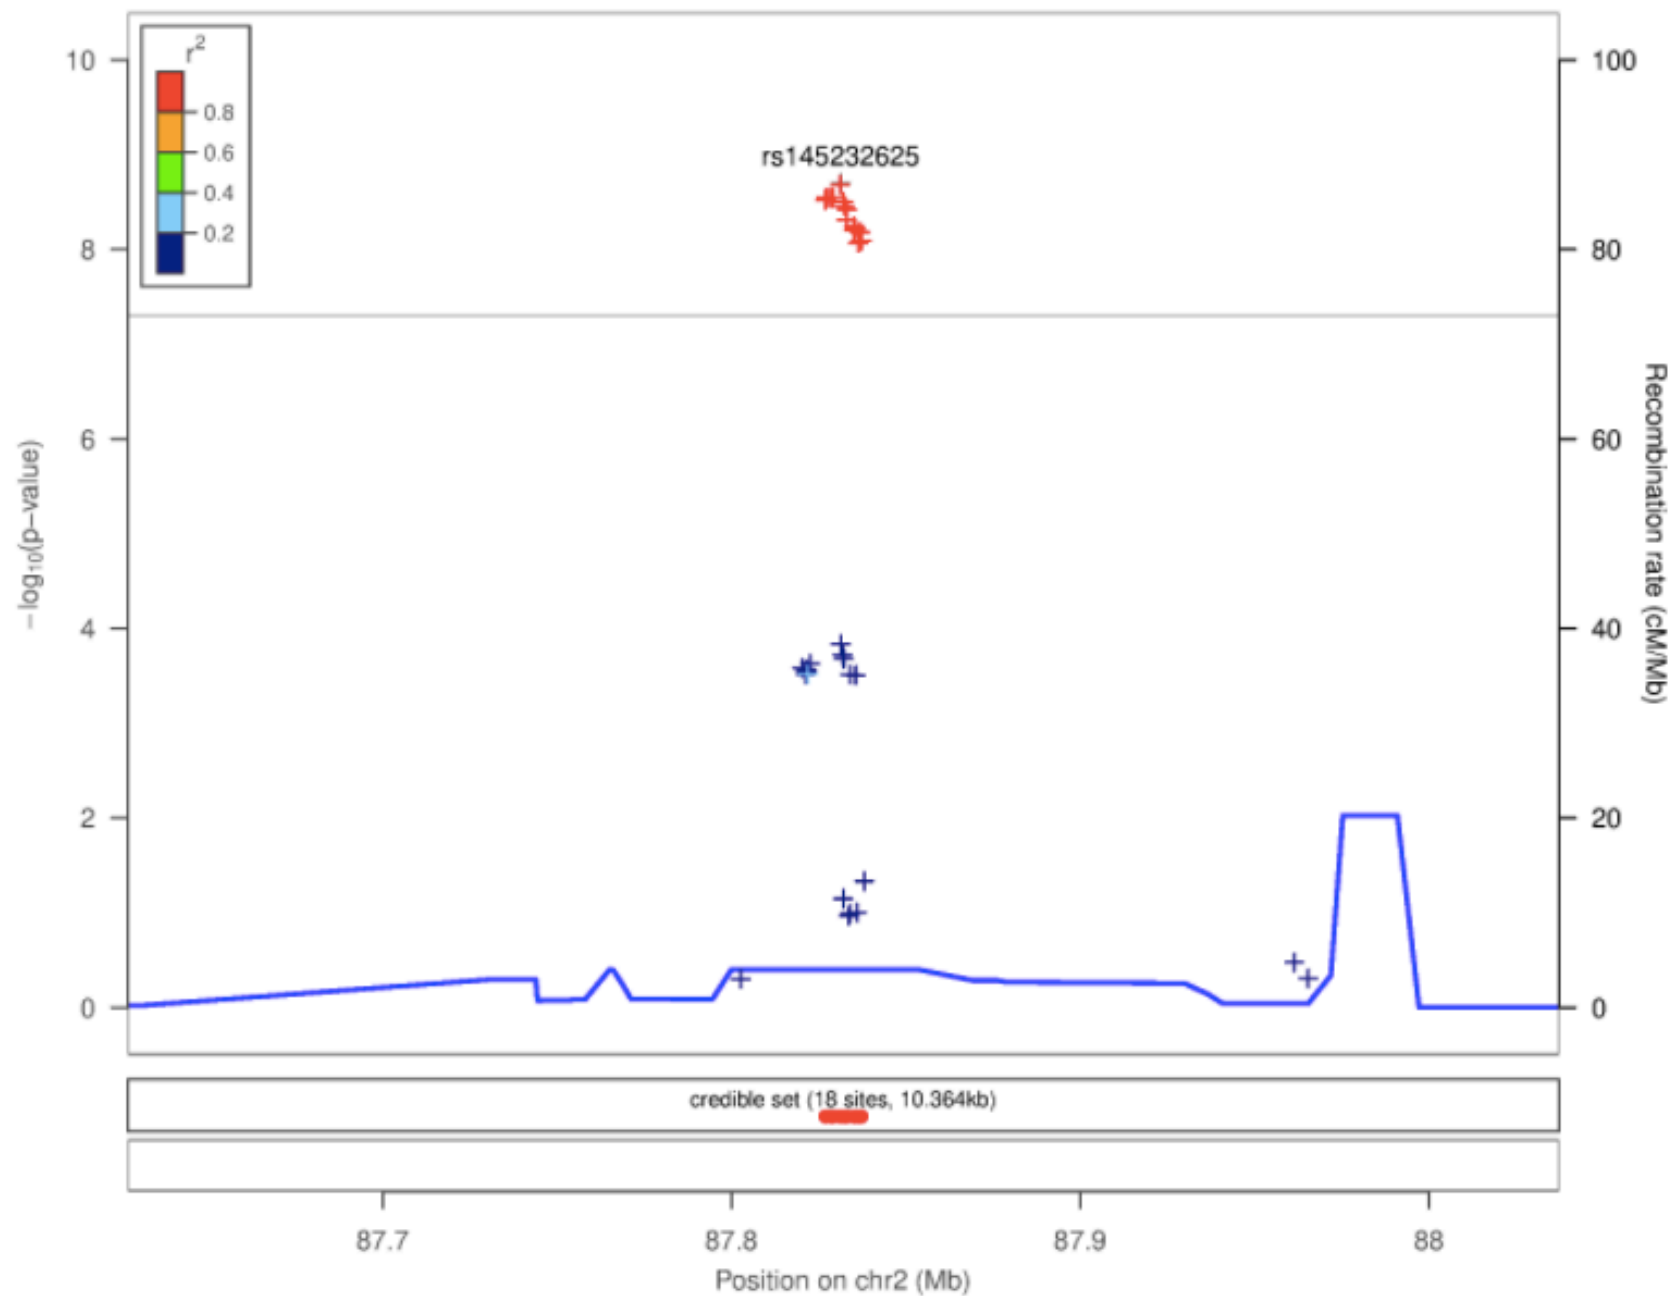

### 3.27 rs4933661: HECTD2-[]-PPP1R3C

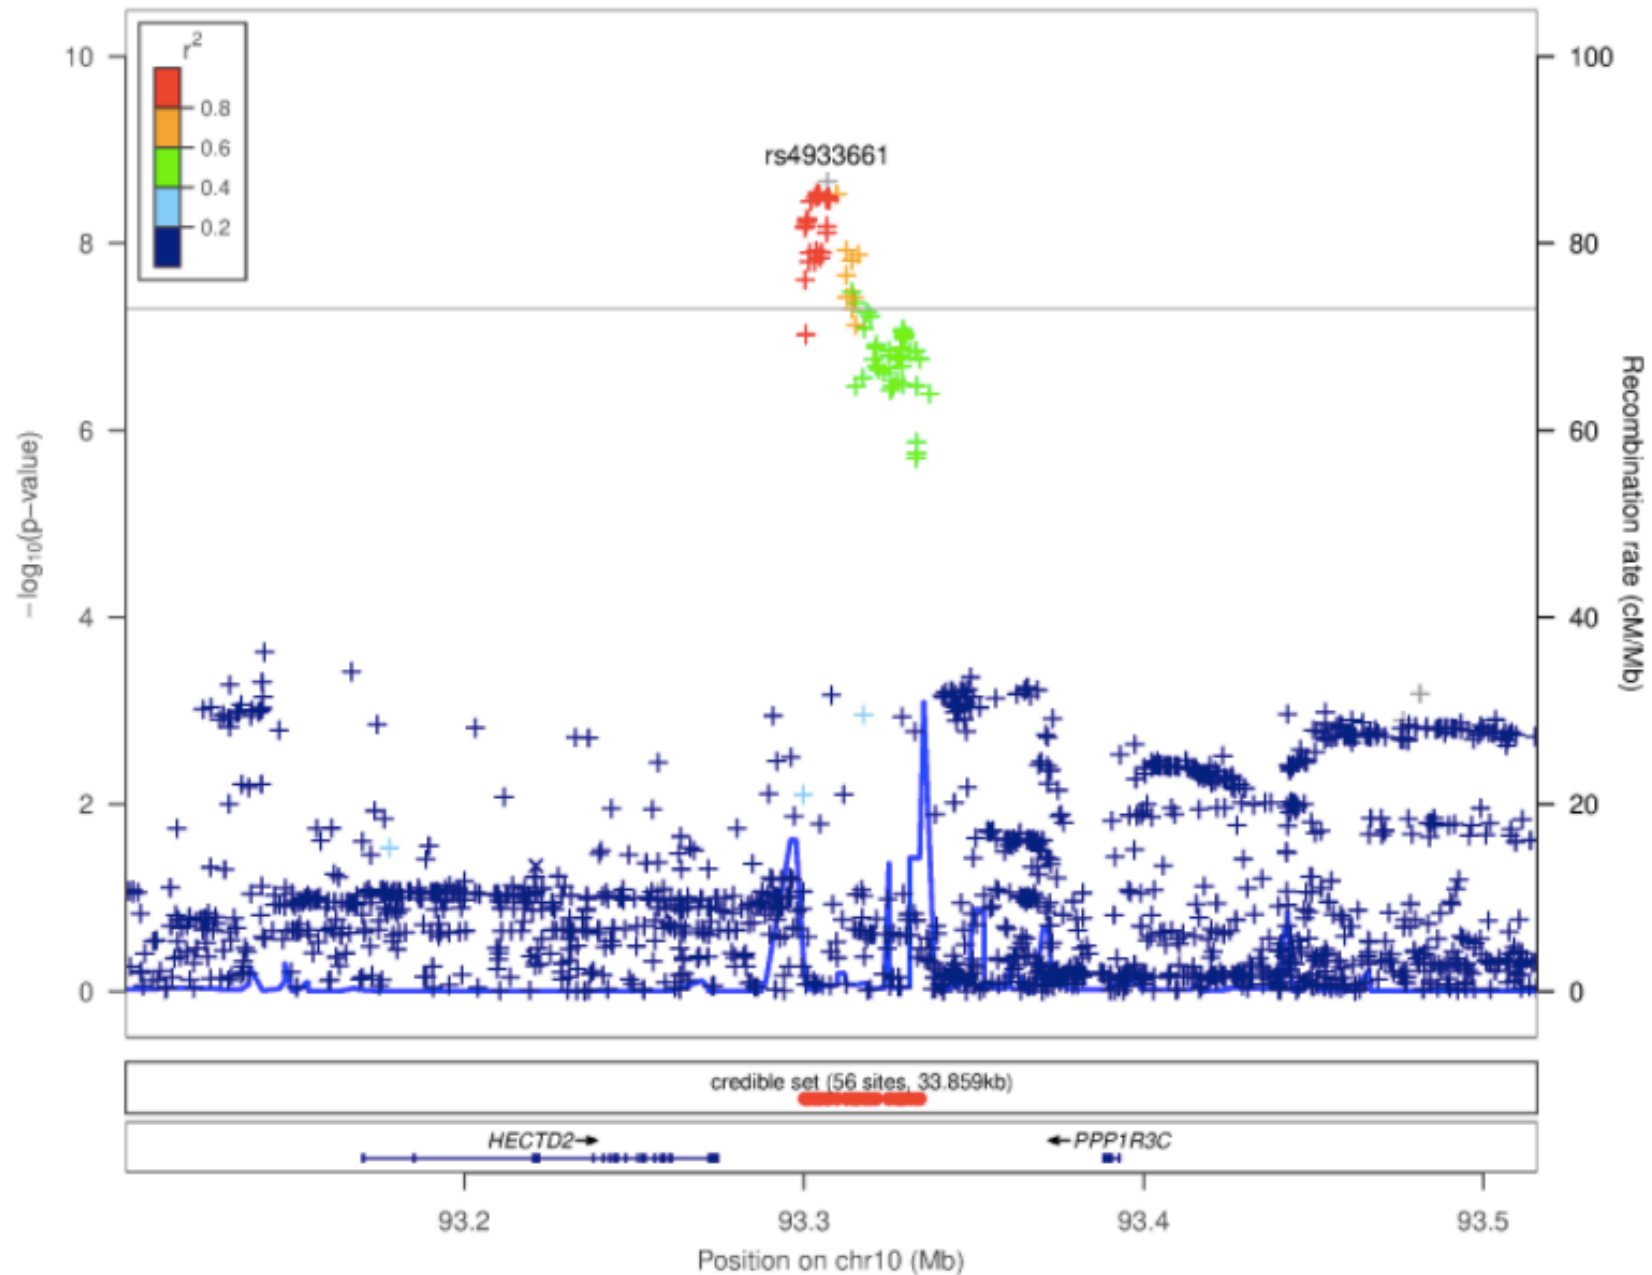

### 3.29 rs758049676: [CLEC16A]

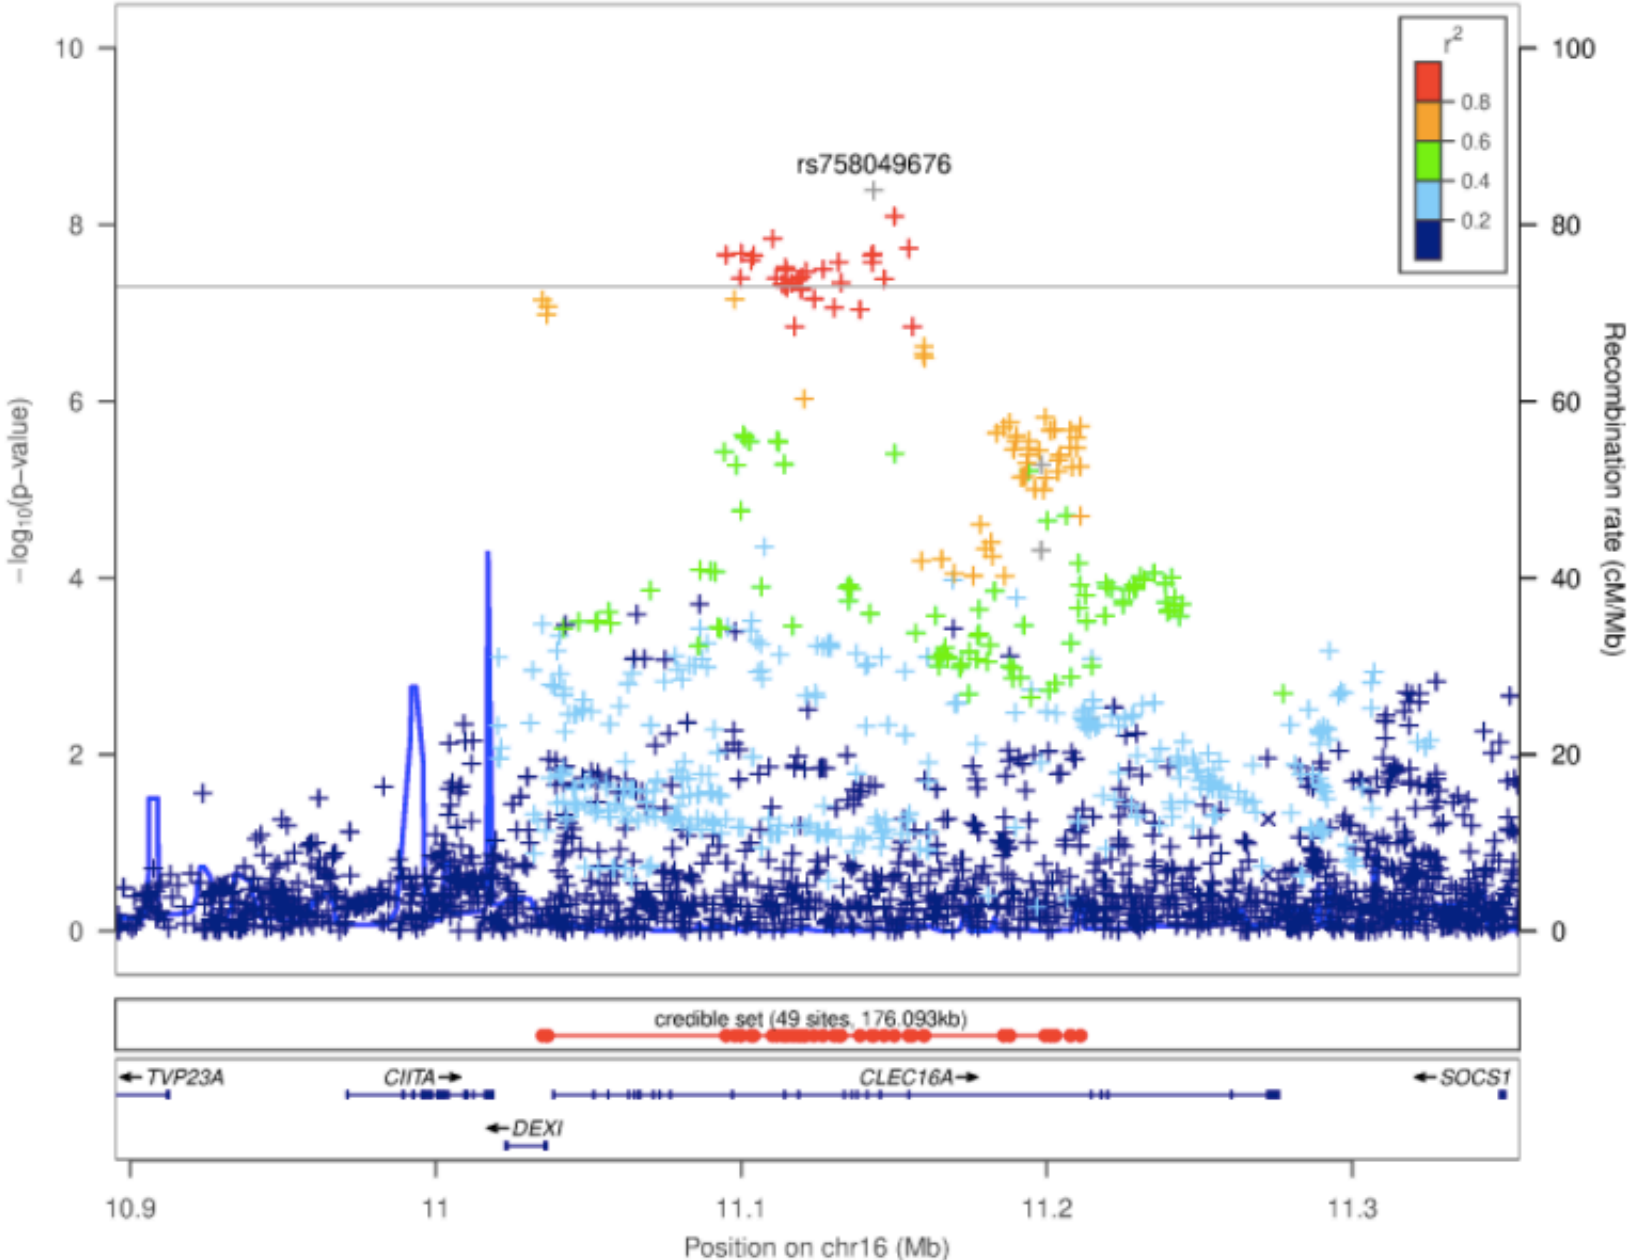

### 3.32 rs2286639: [SLC6A7]

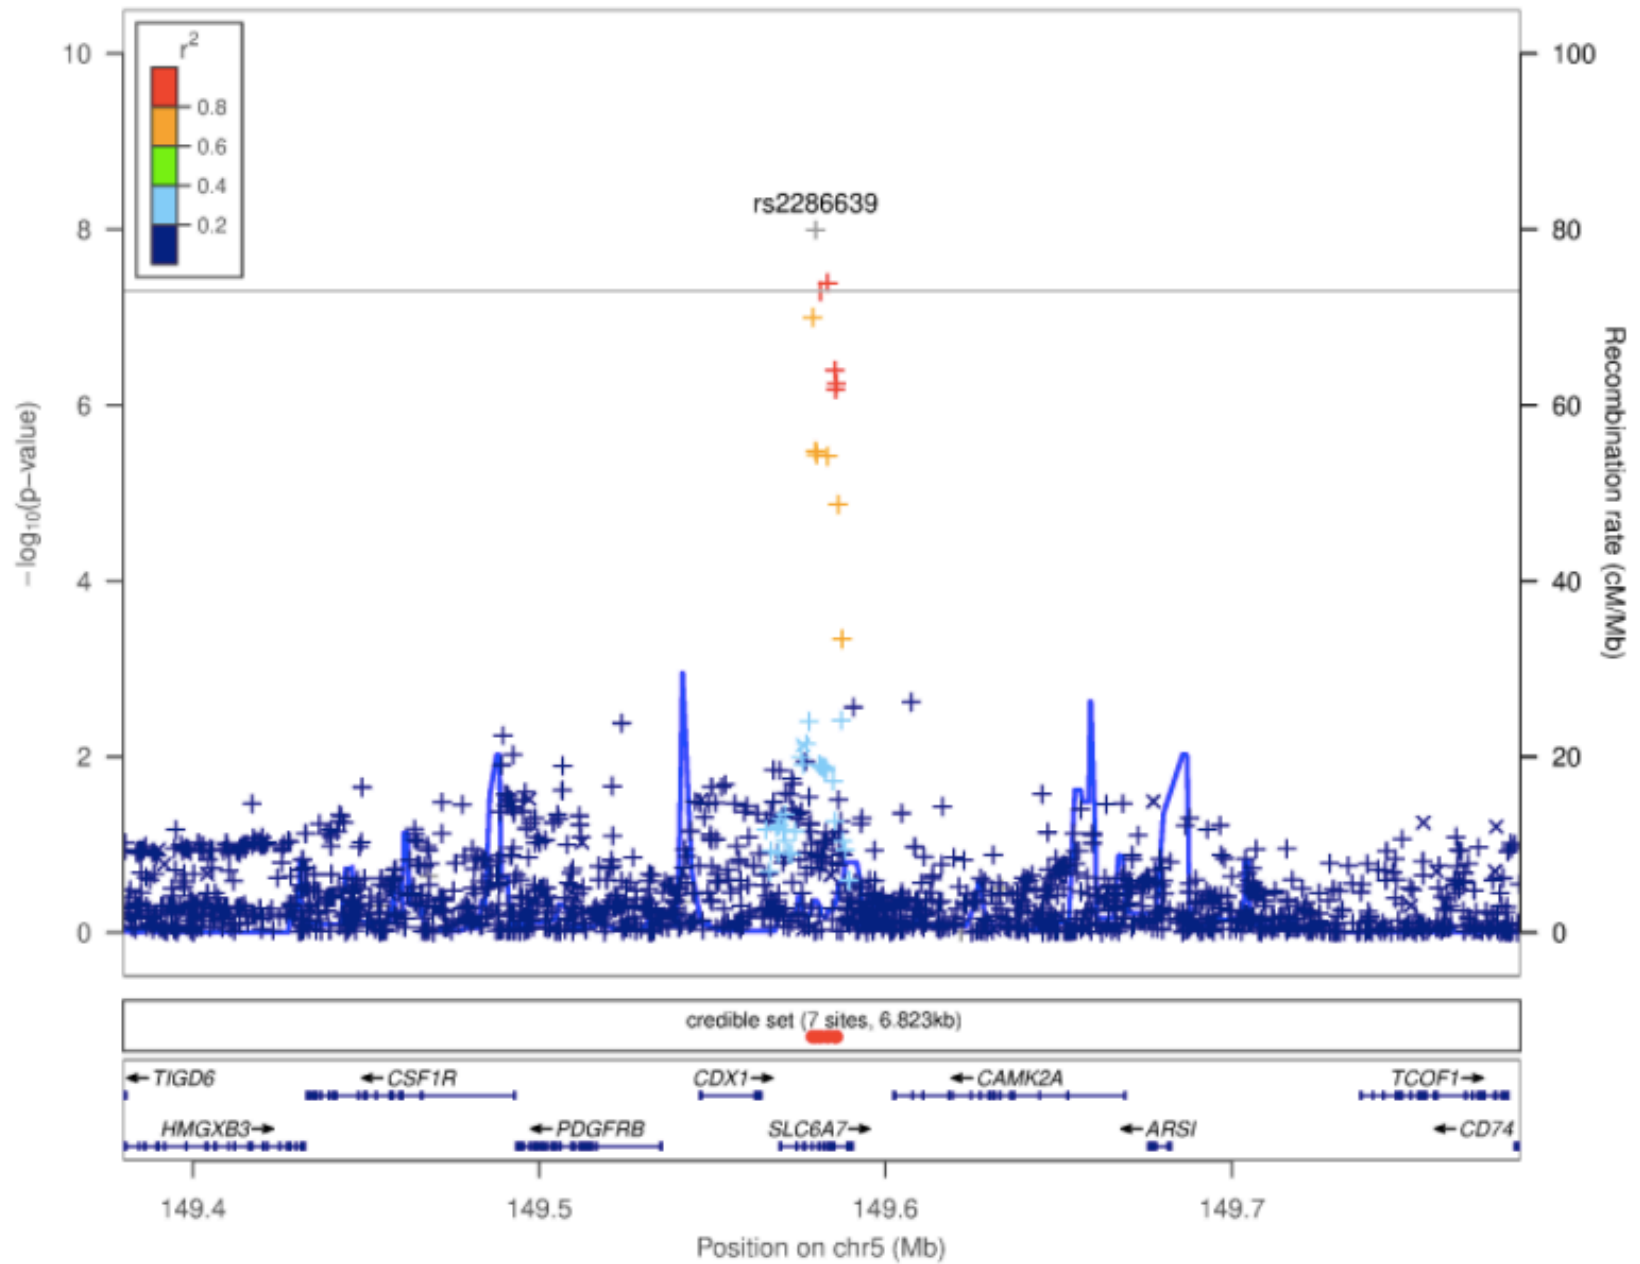

### 3.33 rs11064881: [CIT]

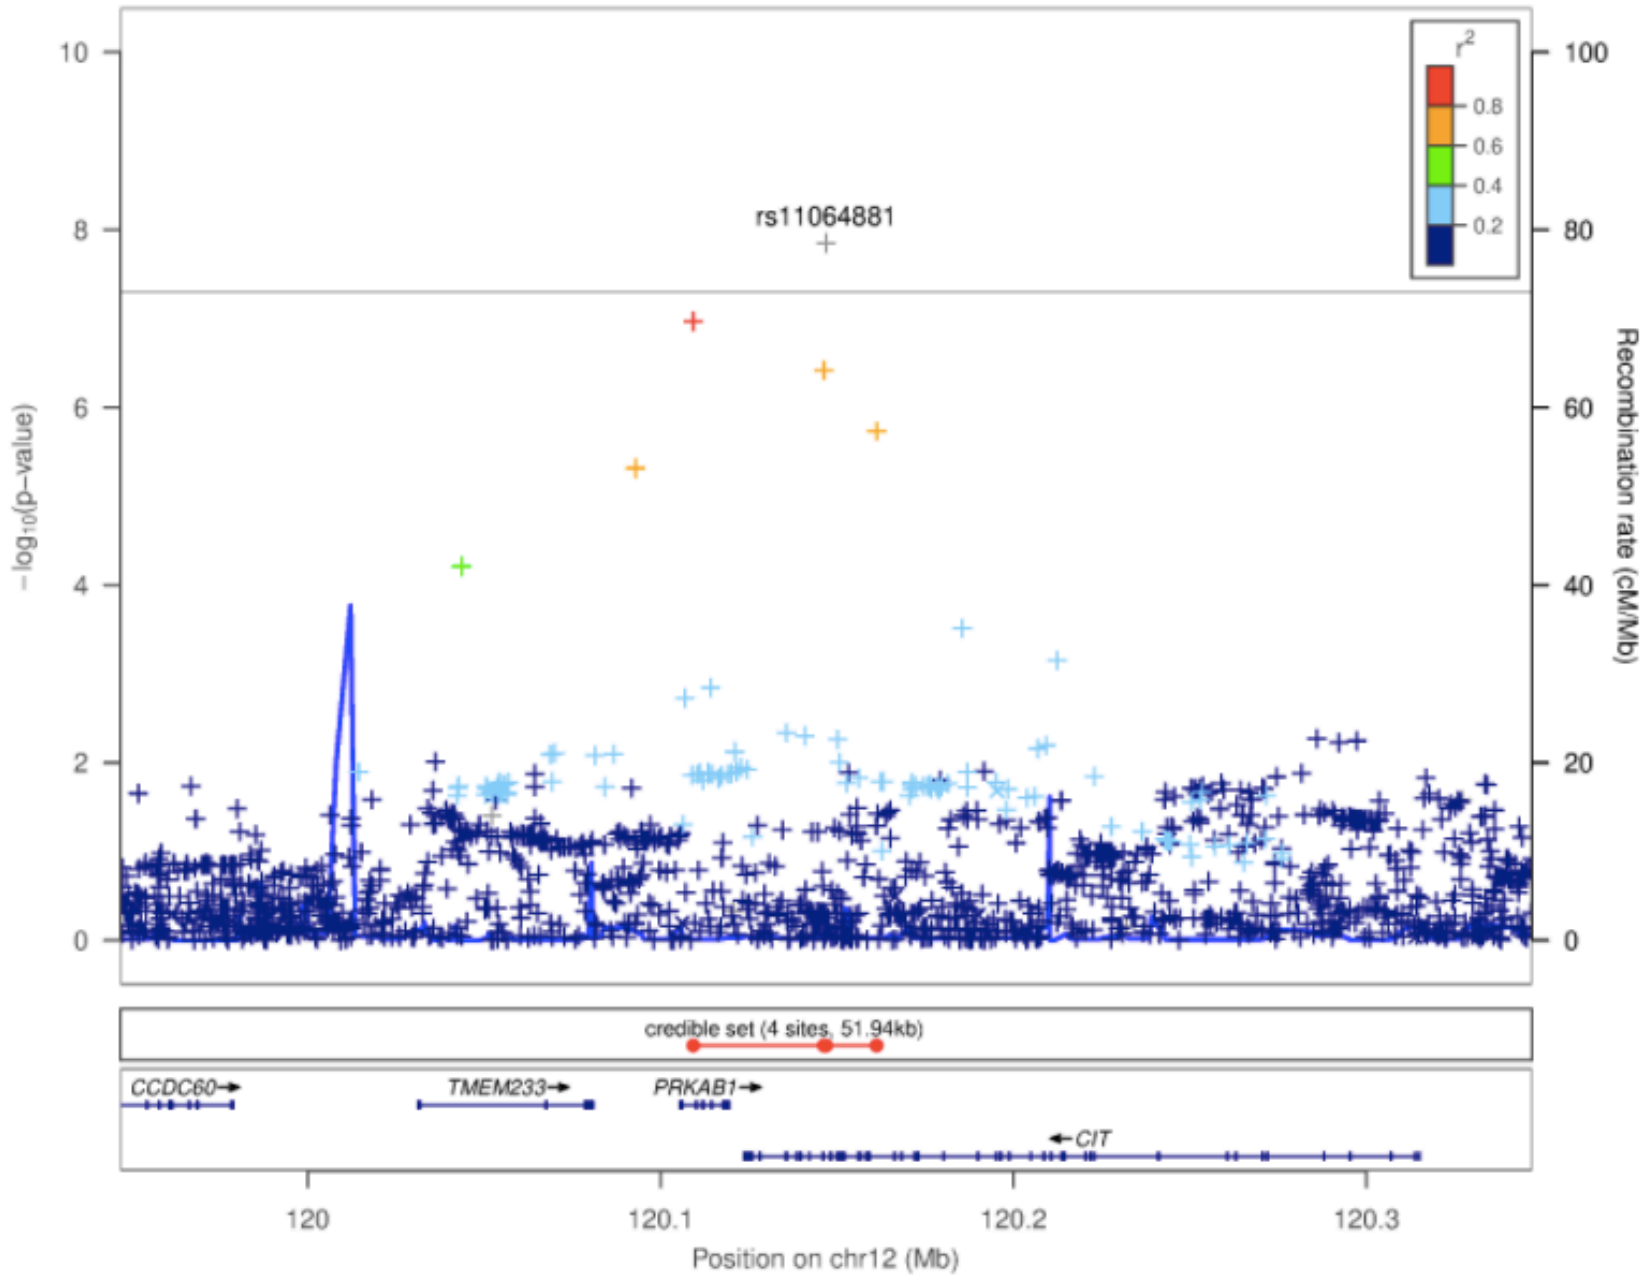



### 3.36 rs681343: [FUT2]

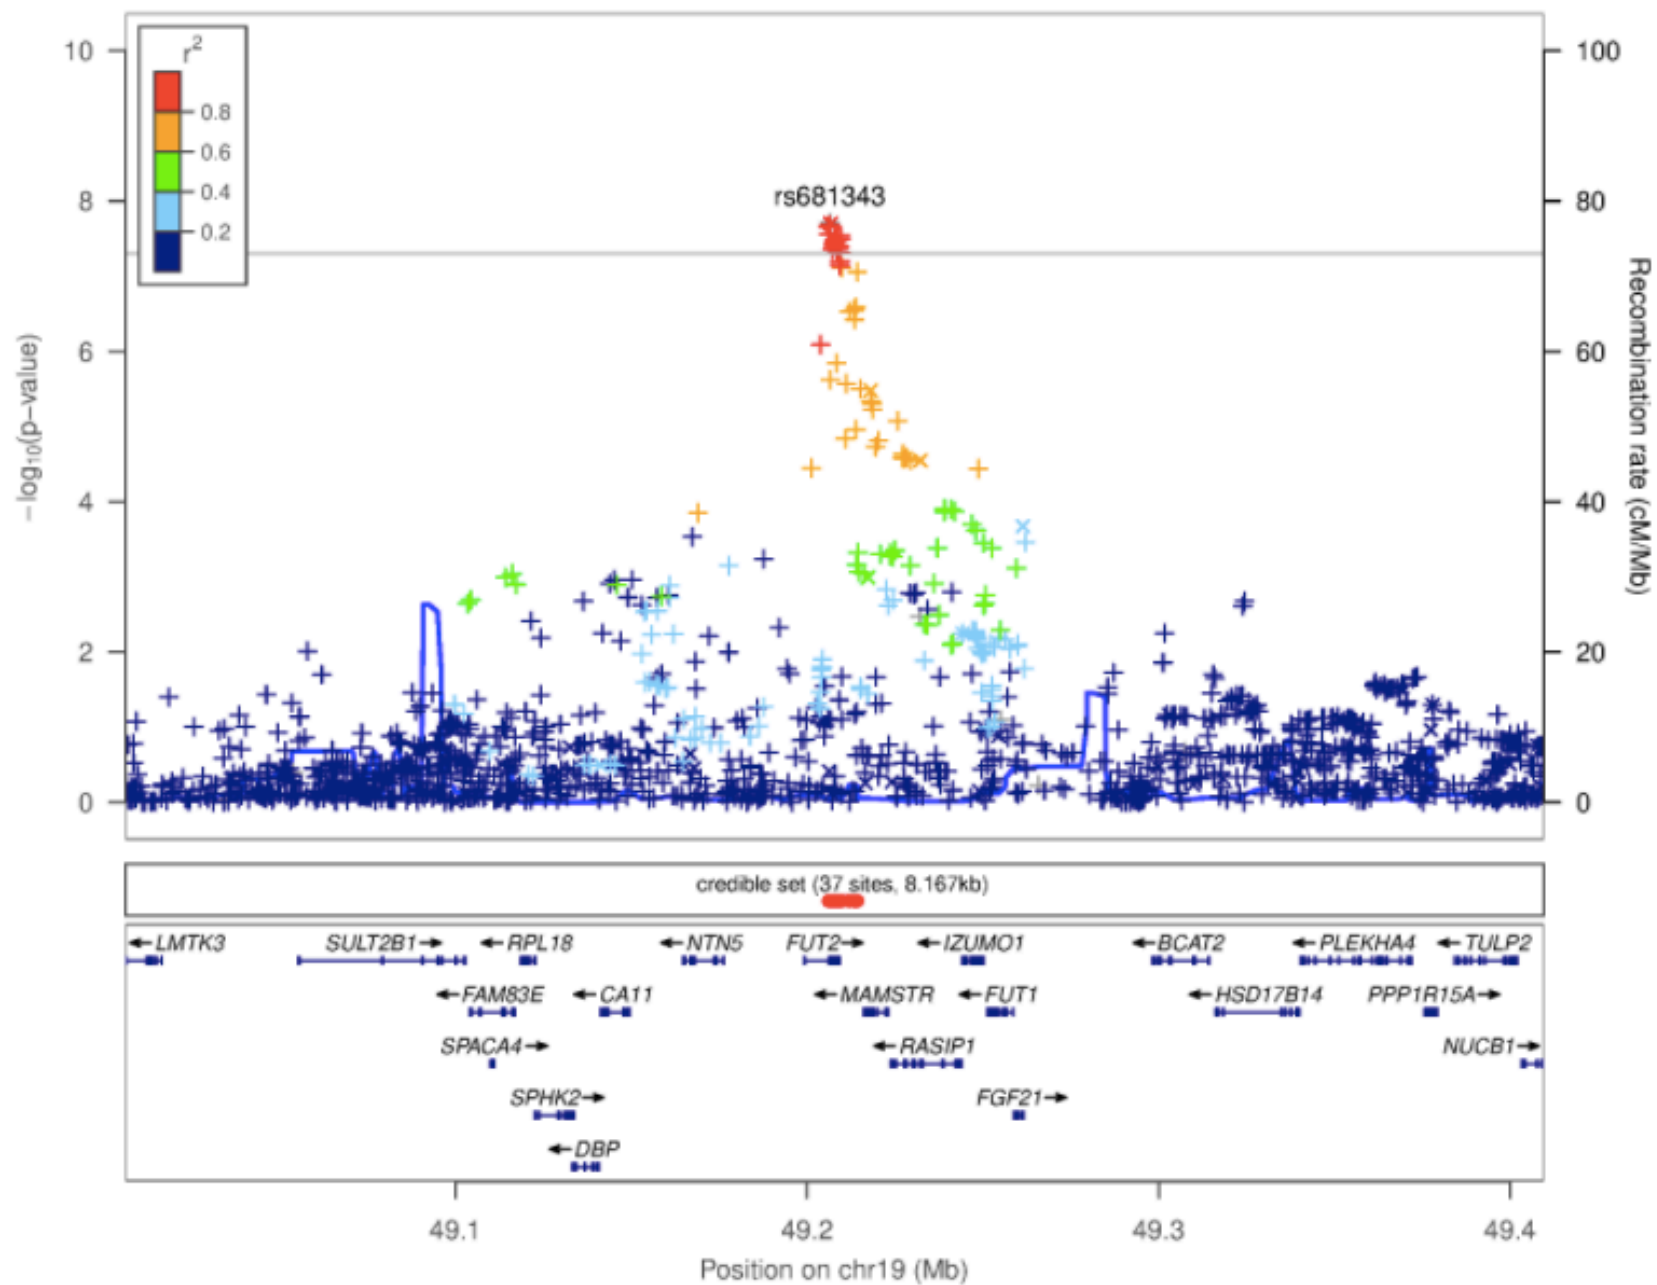



### 3.37 rs11679052: DYSF—□—CYP26B1

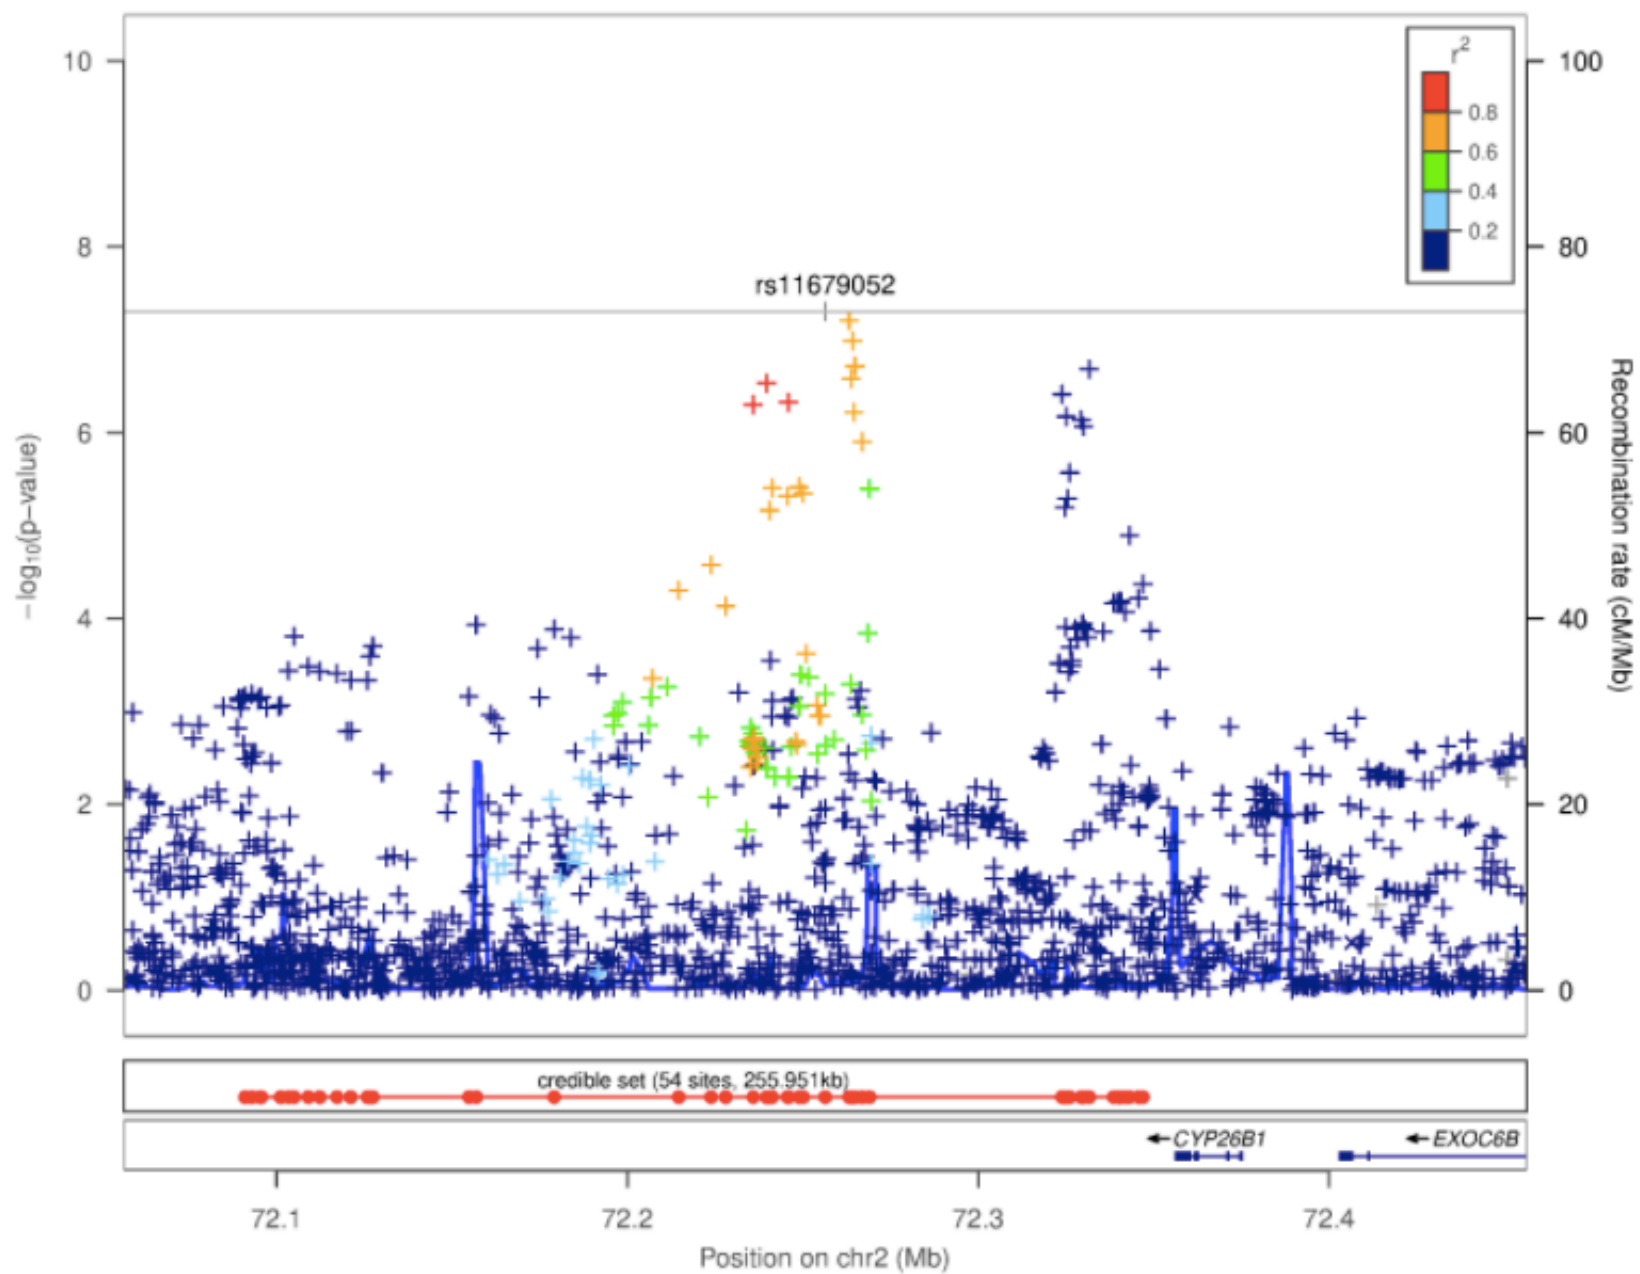

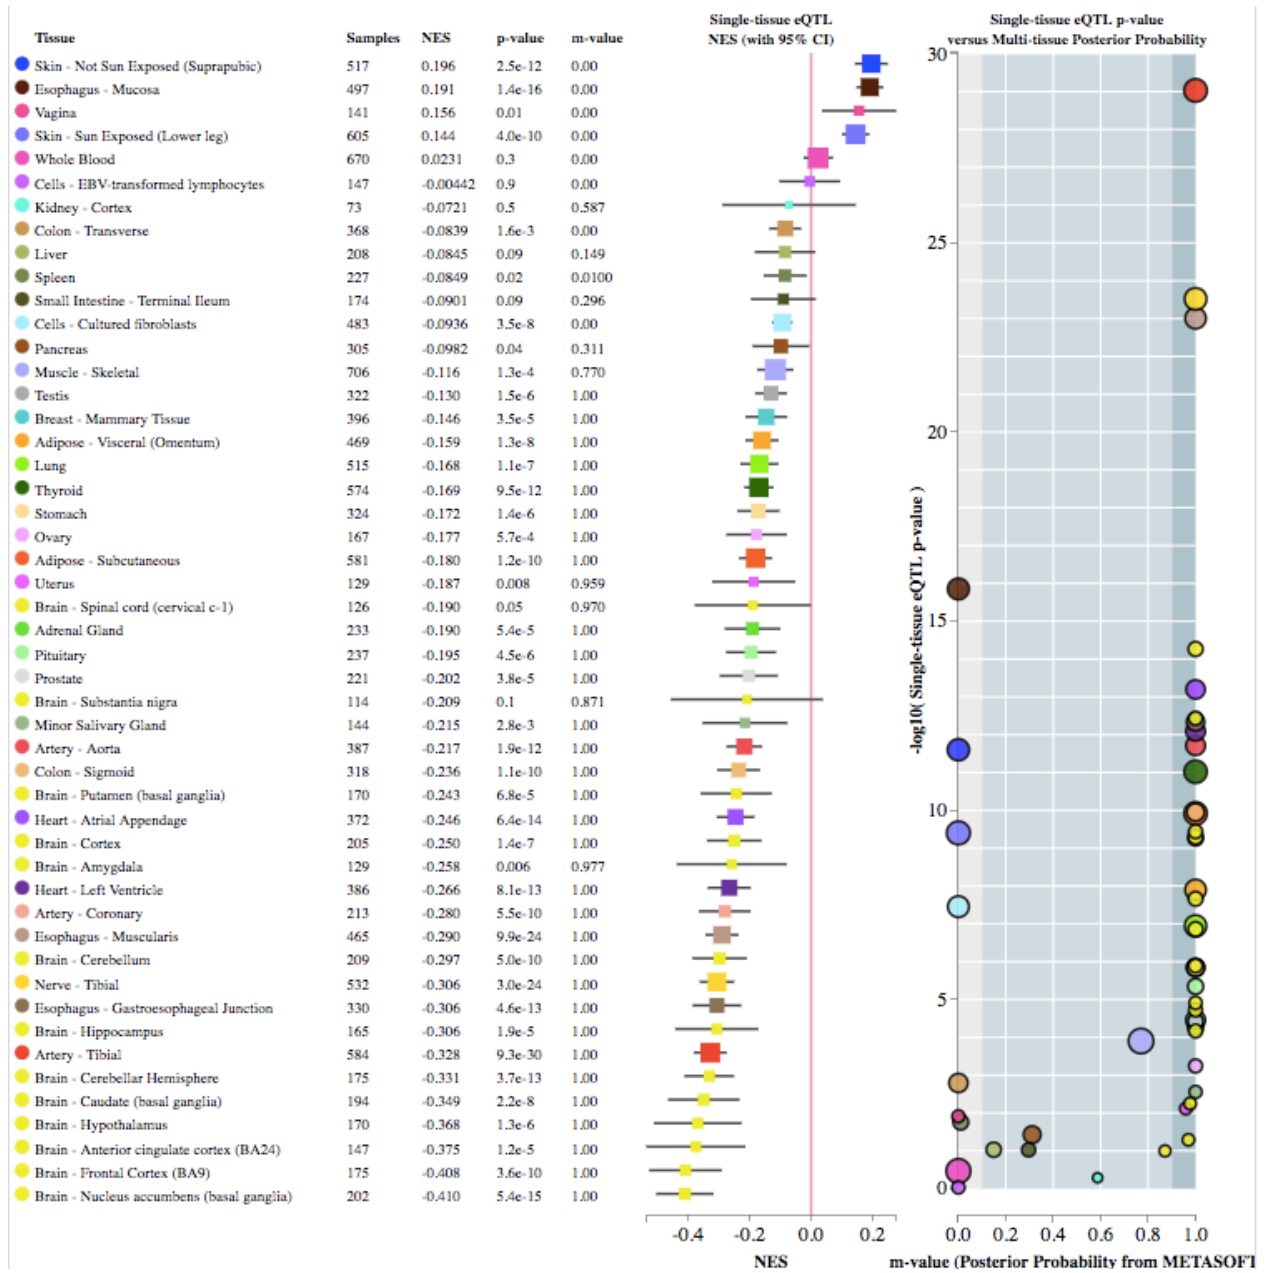

**Fig. S5.**

Multiple tissue eQTL plot of rs1049432 with TFAM expression. The data was downloaded from GTEx 30 October 2020. For most tissues evaluated, additional copies of the T allele are associated with decreased expression.

| ID                 | Full            | 1st Third        | 2nd Third        | 3rd Third       | NUMT474         | NUMT228          | Nearest Gene      |
|--------------------|-----------------|------------------|------------------|-----------------|-----------------|------------------|-------------------|
| rs1049432          | 1.57E-240       | 3.10E-204        | 5.48E-193        | 4.71E-263       | 2.33E-234       | 2.62E-236        | TFAM              |
| <b>rs3843620</b>   | <b>2.70E-58</b> | <b>4.51E-148</b> | <b>5.22E-70</b>  | <b>4.80E-02</b> | <b>3.87E-60</b> | <b>1.56E-138</b> | <b>SIRT3</b>      |
| <b>rs2519067</b>   | <b>4.79E-50</b> | <b>9.49E-139</b> | <b>1.02E-64</b>  | <b>7.87E-01</b> | <b>1.25E-52</b> | <b>2.74E-128</b> | <b>AL645608.2</b> |
| <b>rs1951197:C</b> | <b>7.81E-26</b> | <b>1.47E-116</b> | <b>2.01E-08</b>  | <b>2.71E-02</b> | <b>1.98E-02</b> | <b>3.27E-58</b>  | <b>AKAP6</b>      |
| rs28539606         | 7.67E-25        | 3.99E-18         | 2.05E-18         | 6.42E-33        | 2.85E-24        | 2.04E-21         | HLA-DQB1          |
| <b>rs6471996</b>   | <b>1.16E-21</b> | <b>7.90E-01</b>  | <b>4.13E-158</b> | <b>5.03E-01</b> | <b>1.96E-24</b> | <b>1.72E-53</b>  | <b>NKAIN3</b>     |
| rs4908650          | 6.45E-18        | 1.22E-18         | 2.86E-20         | 2.13E-11        | 1.41E-17        | 4.39E-19         | CAMTA1            |
| rs28602228         | 6.71E-17        | 4.97E-13         | 1.01E-11         | 2.15E-20        | 3.22E-16        | 2.92E-14         | CSF2RA            |
| rs4251979          | 9.51E-17        | 1.18E-13         | 3.79E-12         | 8.05E-20        | 1.22E-15        | 1.59E-15         | IL1RN             |
| rs139145400        | 1.37E-16        | 1.26E-13         | 1.63E-13         | 3.44E-19        | 1.48E-16        | 1.82E-16         | PRDM8             |
| rs1468326          | 2.72E-16        | 1.90E-14         | 7.99E-17         | 1.37E-13        | 6.82E-16        | 1.24E-16         | WNK1              |
| rs73081554         | 3.40E-15        | 3.53E-11         | 1.45E-10         | 1.39E-20        | 1.38E-14        | 4.47E-14         | RPP14             |
| <b>rs571982832</b> | <b>4.23E-15</b> | <b>2.45E-10</b>  | <b>3.95E-07</b>  | <b>1.69E-27</b> | <b>1.81E-16</b> | <b>2.70E-06</b>  | <b>FABP4</b>      |
| rs12461806         | 2.11E-14        | 1.71E-12         | 9.33E-11         | 3.25E-16        | 3.22E-14        | 1.36E-14         | TINCR             |
| <b>rs74750282</b>  | <b>5.46E-14</b> | <b>5.19E-49</b>  | <b>1.67E-11</b>  | <b>8.91E-01</b> | <b>7.67E-14</b> | <b>2.45E-34</b>  | <b>MDFIC</b>      |
| rs370209610        | 8.26E-14        | 1.34E-11         | 7.95E-12         | 1.90E-14        | 1.02E-13        | 1.35E-12         | IFNL4             |
| rs58678340         | 4.68E-13        | 6.21E-12         | 1.35E-11         | 1.07E-11        | 6.80E-13        | 6.59E-13         | TWNK/MRPL43       |
| rs200605061        | 1.10E-12        | 4.53E-14         | 8.11E-11         | 1.37E-10        | 1.26E-12        | 6.16E-14         | WDR72             |
| rs7319964          | 1.17E-12        | 1.45E-11         | 4.56E-10         | 8.12E-13        | 2.71E-12        | 1.13E-12         | KLF5              |
| rs144047415        | 1.83E-12        | 5.85E-09         | 5.15E-12         | 1.28E-11        | 7.23E-13        | 6.62E-10         | RAMP1             |
| rs1469305          | 2.04E-12        | 5.97E-07         | 1.78E-08         | 1.21E-20        | 6.01E-12        | 5.89E-09         | C15orf53          |
| rs2149642          | 2.55E-12        | 1.88E-11         | 1.64E-10         | 4.74E-12        | 5.52E-12        | 1.01E-12         | BMP2              |
| rs143803034        | 3.06E-12        | 2.34E-07         | 1.93E-12         | 1.48E-12        | 4.80E-12        | 4.84E-10         | CCZ1B             |
| <b>rs7728823</b>   | <b>1.44E-10</b> | <b>6.58E-01</b>  | <b>1.12E-49</b>  | <b>1.74E-04</b> | <b>7.62E-12</b> | <b>6.42E-01</b>  | <b>PCBD2</b>      |
| rs10063311         | 2.15E-10        | 1.71E-09         | 1.56E-09         | 8.68E-09        | 4.48E-10        | 5.12E-10         | NDUFS4            |
| rs145232625        | 4.81E-10        | 9.22E-06         | 7.76E-09         | 5.87E-12        | 3.37E-10        | 2.05E-08         | PLGLB2            |
| rs4933661          | 5.34E-10        | 2.68E-10         | 2.72E-12         | 1.58E-06        | 1.73E-09        | 1.06E-10         | HECTD2            |
| rs549950646        | 7.99E-10        | 4.22E-10         | 7.19E-08         | 1.17E-09        | 2.95E-10        | 8.37E-10         | OR4A47            |
| rs758049676        | 1.05E-09        | 2.38E-08         | 4.95E-07         | 7.02E-12        | 2.43E-09        | 3.22E-09         | CLEC16A           |
| rs1544065          | 1.20E-09        | 1.17E-09         | 3.40E-10         | 5.73E-07        | 1.45E-09        | 4.47E-10         | ZNF618            |
| rs35574789         | 2.68E-09        | 8.68E-08         | 4.07E-07         | 3.64E-10        | 3.14E-09        | 8.96E-09         | CXCL6             |
| rs2286639          | 2.78E-09        | 5.04E-07         | 4.28E-07         | 5.24E-12        | 1.90E-09        | 1.08E-07         | SLC6A7            |
| rs11064881         | 3.94E-09        | 1.09E-07         | 1.05E-07         | 2.84E-10        | 1.09E-08        | 1.55E-09         | CIT/PRKAB1        |
| rs191410813        | 4.52E-09        | 1.29E-08         | 8.60E-09         | 6.46E-08        | 1.10E-09        | 9.40E-08         | PGLYRP2           |
| rs645371:T         | 4.90E-09        | 1.59E-09         | 1.28E-08         | 7.33E-08        | 6.02E-09        | 3.08E-09         | LONRF1            |
| rs681343           | 5.62E-09        | 2.51E-07         | 2.26E-08         | 4.32E-08        | 2.50E-09        | 6.48E-08         | FUT2/MAMSTR       |
| rs11679052         | 1.54E-08        | 8.19E-08         | 1.49E-07         | 4.10E-09        | 2.25E-08        | 8.49E-08         | CYP26B1           |

**Table S1.**

Evidence for NUMT interference with GWAS candidate loci. Loci are presented with the unadjusted *p* value for association using distinct quantifications of heteroplasmy. Full refers to

the use of all evaluated positions. The first (m.1-m.6425) second (m.6426-m.11947) and third (m.11947-m.16569) evaluations consider one-third of the mitochondrial positions in each analysis and have no overlap. NUMT 474 refers to the analysis in the absence of positions m.5583-6606 and NUMT 228 is evaluation in the absence of positions m.10270-15488. Positions removed from consideration because their association with heteroplasmy was region dependent are noted in red text.

| Factor      | Degrees of Freedom | Deviance | Residual Deviance | Heritability contribution |
|-------------|--------------------|----------|-------------------|---------------------------|
| Null model  | n.a.               | n.a.     | 321853.41         | n.a.                      |
| rs1049432   | 1                  | 359.02   | 321494.39         | 0.112%                    |
| rs28539606  | 1                  | 33.81    | 321460.57         | 0.011%                    |
| rs28602228  | 1                  | 22.75    | 321437.82         | 0.007%                    |
| rs4251979   | 1                  | 22.73    | 321415.09         | 0.007%                    |
| rs73081554  | 1                  | 19.89    | 321395.20         | 0.006%                    |
| rs12461806  | 1                  | 20.18    | 321375.02         | 0.006%                    |
| rs370209610 | 1                  | 17.99    | 321357.04         | 0.006%                    |
| rs58678340  | 1                  | 16.87    | 321340.16         | 0.005%                    |
| rs200605061 | 1                  | 16.76    | 321323.41         | 0.005%                    |
| rs7319964   | 1                  | 16.40    | 321307.01         | 0.005%                    |
| rs2149642   | 1                  | 15.91    | 321291.10         | 0.005%                    |
| rs143803034 | 1                  | 15.81    | 321275.30         | 0.005%                    |
| rs10063311  | 1                  | 12.98    | 321262.31         | 0.004%                    |
| rs145232625 | 1                  | 12.68    | 321249.63         | 0.004%                    |
| rs4933661   | 1                  | 12.25    | 321237.38         | 0.004%                    |
| rs758049676 | 1                  | 11.63    | 321225.75         | 0.004%                    |
| rs2286639   | 1                  | 11.43    | 321214.32         | 0.004%                    |
| rs11064881  | 1                  | 11.31    | 321203.01         | 0.004%                    |
| rs681343    | 1                  | 11.31    | 321191.70         | 0.004%                    |
| rs11679052  | 1                  | 10.59    | 321181.11         | 0.003%                    |

**Table S2.**

The effect of the 20 loci were regressed in a linear fashion to determine the contribution of individual positions on the heritability of Mthz. Residuals of the original null model (log heteroplasmy ~ age + sex + principal components + log-autosomal variance) were regressed with adjusted  $r^2 = 0.002069$ .

| SNP         | Haplogroup corrected |        | Haplogroup uncorrected |        |
|-------------|----------------------|--------|------------------------|--------|
|             | p-value              | effect | p-value                | effect |
| rs1049432   | 5.4E-240             | 0.035  | 1.6E-240               | 0.035  |
| rs28539606  | 1.2E-24              | 0.020  | 7.7E-25                | 0.020  |
| rs28602228  | 6.0E-17              | 0.008  | 6.7E-17                | 0.008  |
| rs4251979   | 1.2E-16              | -0.008 | 9.5E-17                | -0.008 |
| rs73081554  | 1.5E-15              | -0.014 | 3.4E-15                | -0.014 |
| rs12461806  | 1.6E-14              | -0.012 | 2.1E-14                | -0.012 |
| rs370209610 | 7.6E-14              | -0.023 | 8.3E-14                | -0.023 |
| rs200605061 | 4.3E-13              | 0.010  | 1.1E-12                | 0.009  |
| rs58678340  | 6.8E-13              | -0.025 | 4.7E-13                | -0.026 |
| rs2149642   | 1.1E-12              | 0.007  | 2.5E-12                | 0.007  |
| rs7319964   | 1.5E-12              | -0.006 | 1.2E-12                | -0.006 |
| rs143803034 | 4.8E-12              | -0.015 | 3.1E-12                | -0.015 |
| rs145232625 | 2.3E-10              | -0.006 | 4.8E-10                | -0.006 |
| rs10063311  | 2.6E-10              | -0.006 | 2.2E-10                | -0.006 |
| rs4933661   | 6.7E-10              | 0.005  | 5.3E-10                | 0.005  |
| rs758049676 | 1.0E-09              | 0.005  | 1.0E-09                | 0.005  |
| rs681343    | 3.4E-09              | 0.005  | 5.6E-09                | 0.005  |
| rs2286639   | 4.5E-09              | -0.006 | 2.8E-09                | -0.006 |
| rs11064881  | 3.8E-09              | -0.009 | 4.0E-09                | -0.009 |
| rs11679052  | 1.4E-08              | -0.005 | 1.5E-08                | -0.005 |

**Table S3.**

Haplogroup does not influence the association between Mthz and candidate SNPs. The top associated SNPs from Table 3 were re-evaluated with consideration of the impact of the 19 most common haplogroups. Corrected and uncorrected p-values for association with Mthz and effect size are shown. Significance values were not adjusted for genomic inflation.

| Covariate          | Estimate  | Std. Error | t-value | Pr(> t )  |
|--------------------|-----------|------------|---------|-----------|
| age                | -0.000104 | 0.000033   | -3.2    | 0.0016    |
| sexF               | -0.032068 | 0.001167   | -27.5   | 2.70E-166 |
| pc.0               | 0.00391   | 0.000579   | 6.8     | 1.40E-11  |
| pc.1               | -0.000933 | 0.000582   | -1.6    | 0.11      |
| pc.2               | 0.00104   | 0.00058    | 1.8     | 0.073     |
| pc.3               | -0.000344 | 0.000582   | -0.6    | 0.55      |
| pc.4               | 0.001665  | 0.000584   | 2.8     | 0.0044    |
| autosomal variance | 0.65565   | 0.000885   | 740.6   | <E-300    |
| mtDNA copy number  | 0.265338  | 0.003963   | 67      | <E-300    |

**Table S4.**

Effect of covariates on mean Mthz including age, sex, principal components, autosomal variance and relative mtDNA copy number on a logarithmic scale.

| SNP         | Copy-number corrected |           | Uncorrected |           |
|-------------|-----------------------|-----------|-------------|-----------|
|             | p-value               | effect    | p-value     | effect    |
| rs1049432   | 3.42E-231             | 0.034364  | 1.57E-240   | 0.035052  |
| rs28539606  | 5.70E-20              | 0.017706  | 7.67E-25    | 0.019912  |
| rs28602228  | 2.18E-12              | 0.006956  | 6.71E-17    | 0.008271  |
| rs4251979   | 1.56E-14              | -0.007128 | 9.51E-17    | -0.007711 |
| rs73081554  | 1.33E-12              | -0.012681 | 3.40E-15    | -0.014083 |
| rs12461806  | 7.48E-14              | -0.011468 | 2.11E-14    | -0.011718 |
| rs370209610 | 2.60E-12              | -0.02117  | 8.26E-14    | -0.022585 |
| rs58678340  | 1.32E-12              | -0.025059 | 4.68E-13    | -0.025557 |
| rs200605061 | 3.41E-13              | 0.009628  | 1.10E-12    | 0.009417  |
| rs7319964   | 6.80E-12              | -0.005679 | 1.17E-12    | -0.005883 |
| rs2149642   | 7.36E-13              | 0.007028  | 2.55E-12    | 0.006859  |
| rs143803034 | 1.21E-10              | -0.013852 | 3.06E-12    | -0.015008 |
| rs10063311  | 2.76E-10              | -0.006245 | 2.15E-10    | -0.006282 |
| rs145232625 | 2.54E-09              | -0.005508 | 4.81E-10    | -0.005753 |
| rs4933661   | 4.35E-11              | 0.005758  | 5.34E-10    | 0.005422  |
| rs758049676 | 8.06E-09              | 0.004902  | 1.05E-09    | 0.005186  |
| rs2286639   | 3.42E-08              | -0.005634 | 2.78E-09    | -0.006067 |
| rs11064881  | 1.42E-08              | -0.008908 | 3.94E-09    | -0.009244 |
| rs681343    | 4.87E-10              | 0.005108  | 5.62E-09    | 0.004783  |
| rs11679052  | 9.59E-09              | -0.004816 | 1.54E-08    | -0.004748 |

**Table S5.**

mtDNA copy number does not influence the association between MtHz and candidate SNPs. The top associated SNPs from Table 3 were re-evaluated with consideration of mtDNA quantity evaluated by the LRR at mitochondrial positions. Corrected and uncorrected p-values for association with MtHz and effect size are shown. Significance values were not adjusted for genomic inflation.



**Table S6.**

PheWAS was performed by comparison with prior analyses. We evaluated the association of 19 SNPs associated with MtHz with 1123 traits. The table shows the SNP-phenotype interactions that met genome wide significance after correction ( $0.05/1123/19 \sim 2.34 \times 10^{-6}$ ). The SNP, phenotype, number of cases and controls, association test  $p$  value, effect size ( $\beta$ ), standard error and dosage of the minor allele in the unaffected (dose.b.0) and affected (dose.b.1) populations are shown. For quantitative traits, all individuals are listed as cases and the dose.b.1 is not provided.

| assay.name | pheno                          | cases   | controls | pvalue    | effect      | stderr      | dose.b.0    | dose.b.1    |
|------------|--------------------------------|---------|----------|-----------|-------------|-------------|-------------|-------------|
| rs10063311 | age_first_menses               | 390677  | NA       | 8.28E-10  | -0.01352154 | 0.002202399 | 0.449047755 | NA          |
| rs10063311 | hair_curl                      | 358411  | NA       | 1.49E-25  | 0.03296623  | 0.003154983 | 0.446727171 | NA          |
| rs10063311 | haircolor                      | 497612  | NA       | 8.65E-19  | -0.02357194 | 0.002663042 | 0.447570339 | NA          |
| rs10063311 | iqb.age_gray                   | 378006  | NA       | 1.02E-28  | -0.08222283 | 0.007394595 | 0.447235694 | NA          |
| rs10063311 | iqb.gray_amount                | 372689  | NA       | 4.52E-66  | 0.077313196 | 0.004502232 | 0.44708915  | NA          |
| rs10063311 | iqb.shampoo_type               | 587676  | NA       | 7.09E-14  | 0.010587199 | 0.001414219 | 0.448503269 | NA          |
| rs10063311 | unibrow                        | 331791  | NA       | 2.91E-10  | -0.01511768 | 0.002398175 | 0.448780442 | NA          |
| rs1049432  | pcos                           | 61181   | 839824   | 5.64E-07  | -0.03892159 | 0.007806838 | 0.366425643 | 0.354794433 |
| rs11064881 | chronotype                     | 1619437 | NA       | 9.24E-11  | -0.0120804  | 0.001864564 | 1.853099923 | NA          |
| rs11064881 | hashimotos                     | 59604   | 1478372  | 2.90E-07  | 0.062311888 | 0.012239639 | 1.852729326 | 1.859797835 |
| rs11064881 | iqb.dandruff_frequency         | 949273  | NA       | 2.33E-07  | 0.016583233 | 0.003207    | 1.853640682 | NA          |
| rs11064881 | morning_person                 | 629476  | 598088   | 8.94E-10  | -0.03284959 | 0.005362014 | 1.855662676 | 1.851813439 |
| rs11064881 | severe_acne                    | 169557  | 1401733  | 1.21E-09  | -0.04457349 | 0.007300037 | 1.853370129 | 1.84784861  |
| rs11679052 | iqb.toenail_fungus             | 117094  | 399201   | 1.18E-10  | -0.03212283 | 0.004984532 | 1.154887677 | 1.140398319 |
| rs12461806 | chronotype                     | 1619437 | NA       | 3.23E-10  | 0.011265847 | 0.001791861 | 1.826424094 | NA          |
| rs12461806 | morning_person                 | 629476  | 598088   | 2.27E-09  | 0.030703343 | 0.005136738 | 1.823944649 | 1.827992693 |
| rs2149642  | iqb.prono_to_bad_breath        | 216377  | NA       | 6.46E-22  | -0.03712941 | 0.003858513 | 1.550208438 | NA          |
| rs28539606 | acne_as_teenager               | 422542  | NA       | 2.86E-07  | 0.020164513 | 0.003928739 | 0.295000974 | NA          |
| rs28539606 | actinic_keratosis              | 78578   | 1536429  | 1.34E-07  | 0.056007636 | 0.010573167 | 0.295588867 | 0.29603385  |
| rs28539606 | adult_onset_asthma             | 81619   | 853177   | 9.13E-32  | -0.13692392 | 0.011785774 | 0.29695937  | 0.28061781  |
| rs28539606 | allergic_asthma                | 104543  | 861684   | 6.65E-80  | -0.18813669 | 0.010064689 | 0.299725912 | 0.271284761 |
| rs28539606 | anemia                         | 238175  | 1262531  | 2.11E-09  | -0.03659738 | 0.006124385 | 0.296340813 | 0.288495482 |
| rs28539606 | ankylosing_spondylitis         | 13047   | 1543159  | 3.65E-08  | 0.126694413 | 0.022730656 | 0.294968467 | 0.312889261 |
| rs28539606 | any_allergy                    | 648614  | 942179   | 7.12E-88  | -0.08427213 | 0.004249466 | 0.30112458  | 0.28603535  |
| rs28539606 | any_animal_allergy             | 166363  | 974178   | 3.39E-135 | -0.1824793  | 0.007480454 | 0.300941193 | 0.270530131 |
| rs28539606 | any_asthma                     | 206177  | 823992   | 1.16E-125 | -0.18537931 | 0.007849615 | 0.300118619 | 0.275316803 |
| rs28539606 | any_food_allergy               | 106711  | 1004984  | 8.75E-24  | -0.08964811 | 0.008982646 | 0.300618392 | 0.284812951 |
| rs28539606 | any_non_melanoma_skin_can      | 197878  | 1382061  | 5.36E-31  | 0.081152669 | 0.006977163 | 0.295335555 | 0.298976876 |
| rs28539606 | any_plant_allergy              | 255833  | 948996   | 5.25E-60  | -0.10029774 | 0.006178942 | 0.300922553 | 0.28167604  |
| rs28539606 | any_skin_cancer                | 239227  | 1369761  | 2.17E-25  | 0.067501772 | 0.006459686 | 0.295412399 | 0.297382228 |
| rs28539606 | asthma_efficacy_albuterol      | 68568   | NA       | 2.01E-07  | -0.05506133 | 0.010590827 | 0.27147738  | NA          |
| rs28539606 | asthma_efficacy_short_beta_2   | 69955   | NA       | 1.81E-07  | -0.05457872 | 0.010460516 | 0.271803694 | NA          |
| rs28539606 | basal_cell_carcinoma           | 155625  | 1455757  | 1.24E-40  | 0.101528103 | 0.007558439 | 0.295070806 | 0.301629974 |
| rs28539606 | blood_sugar_meds               | 68178   | 456532   | 1.21E-06  | -0.05964032 | 0.012332674 | 0.295249608 | 0.284990952 |
| rs28539606 | cat_allergy                    | 158067  | 1011379  | 6.56E-155 | -0.19776863 | 0.007580679 | 0.300726979 | 0.267632839 |
| rs28539606 | celiac_HLA_all                 | 17418   | 909817   | 1.70E-31  | -0.34257819 | 0.030338101 | 0.18098716  | 0.152492747 |
| rs28539606 | cervical_cancer                | 12811   | 964141   | 4.80E-10  | -0.14864522 | 0.024250568 | 0.29492056  | 0.266899095 |
| rs28539606 | cold_sores                     | 233604  | 307800   | 2.14E-06  | -0.0395045  | 0.008338398 | 0.297421775 | 0.291820611 |
| rs28539606 | crohns_or_ulcerative_colitis   | 40358   | 1588350  | 1.05E-19  | 0.125000751 | 0.013612123 | 0.29511966  | 0.315401302 |
| rs28539606 | crohns_or_ulcerative_colitis_v | 54554   | 1573157  | 1.16E-19  | 0.106975184 | 0.011681026 | 0.295014626 | 0.312567671 |
| rs28539606 | current_asthma                 | 49137   | 876625   | 1.68E-33  | -0.17438943 | 0.014661534 | 0.29957015  | 0.273265132 |
| rs28539606 | dog_allergy                    | 87809   | 1031313  | 5.59E-95  | -0.20037438 | 0.009869573 | 0.300534218 | 0.266971497 |
| rs28539606 | dust_mites_allergy             | 171964  | 1010371  | 1.25E-54  | -0.11190238 | 0.007250719 | 0.300603749 | 0.281046332 |
| rs28539606 | dust_mites_allergy_clean       | 165833  | 253006   | 7.49E-37  | -0.11610265 | 0.009172663 | 0.298175606 | 0.28060909  |
| rs28539606 | eczema                         | 195491  | 1401188  | 3.06E-15  | 0.050961721 | 0.006435782 | 0.294781807 | 0.303280242 |
| rs28539606 | eggs_allergy                   | 12300   | 1052779  | 4.60E-07  | -0.12944047 | 0.026006485 | 0.30024814  | 0.278173658 |
| rs28539606 | fish_allergy                   | 10227   | 1053530  | 1.98E-10  | -0.17593917 | 0.028151384 | 0.300232438 | 0.273150172 |
| rs28539606 | grasses_allergy                | 187557  | 1003033  | 9.49E-83  | -0.1333331  | 0.006989914 | 0.30062937  | 0.276122569 |
| rs28539606 | graves                         | 14455   | 1525548  | 3.14E-09  | -0.13338752 | 0.022822463 | 0.295689965 | 0.275549852 |
| rs28539606 | hashimotos                     | 59604   | 1478372  | 4.05E-76  | -0.21401166 | 0.011827265 | 0.296470635 | 0.26641555  |
| rs28539606 | high_chol                      | 192074  | 704263   | 1.03E-23  | 0.068143947 | 0.006762169 | 0.293534794 | 0.304486077 |
| rs28539606 | high_cholesterol_broad         | 629368  | 1349088  | 1.28E-13  | 0.032681932 | 0.004406853 | 0.29592425  | 0.298126472 |
| rs28539606 | high_ldl                       | 126387  | 478790   | 1.70E-11  | 0.056457567 | 0.008361854 | 0.292803409 | 0.301354116 |
| rs28539606 | HIP_allergies                  | 628721  | 923844   | 5.50E-89  | -0.08467265 | 0.004242795 | 0.301189622 | 0.285978418 |
| rs28539606 | hyperthyroidism                | 26967   | 1539438  | 2.00E-06  | -0.07963088 | 0.016891496 | 0.295666359 | 0.283176733 |
| rs28539606 | hypothyroidism                 | 186956  | 1348462  | 2.87E-98  | -0.14653859 | 0.007039673 | 0.297998629 | 0.27522677  |
| rs28539606 | iqb.childhood_ear_infections   | 214809  | 322672   | 1.30E-07  | -0.04416927 | 0.008375562 | 0.29733381  | 0.290092975 |
| rs28539606 | iqb.dandruff_frequency         | 949273  | NA       | 3.39E-34  | 0.038173602 | 0.003130673 | 0.295010453 | NA          |
| rs28539606 | iqb.diagnosed_benign_migrat    | 9045    | 247927   | 2.89E-34  | -0.34294985 | 0.029172443 | 0.295653122 | 0.239754855 |
| rs28539606 | iqb.mosquito_bite_size         | 498946  | NA       | 5.67E-07  | -0.02295636 | 0.004589231 | 0.294533113 | NA          |
| rs28539606 | iqb.own_cat                    | 335275  | 539165   | 5.32E-08  | 0.028489655 | 0.005232979 | 0.293498295 | 0.295402659 |

|            |                             |         |         |           |             |             |             |             |
|------------|-----------------------------|---------|---------|-----------|-------------|-------------|-------------|-------------|
| rs28539606 | iqb.peanut_allergy_fh       | 24764   | 605951  | 4.28E-11  | -0.10077961 | 0.015446377 | 0.295074399 | 0.275806429 |
| rs28539606 | iqb.pneumonia_frequency     | 396176  | NA      | 8.81E-08  | -0.02662569 | 0.004977109 | 0.293717795 | NA          |
| rs28539606 | iqb.whooping_cough          | 45580   | 459379  | 2.79E-19  | -0.13865314 | 0.015605981 | 0.297039959 | 0.278447241 |
| rs28539606 | juvenile_asthma             | 112441  | 855660  | 1.43E-105 | -0.21524633 | 0.009998273 | 0.299828656 | 0.271009162 |
| rs28539606 | juvenile_asthma_not_current | 32778   | 881682  | 4.58E-33  | -0.20528682 | 0.017437549 | 0.299470681 | 0.270498799 |
| rs28539606 | juvenile_t1d                | 4440    | 1637886 | 4.84E-69  | -0.7979413  | 0.049884656 | 0.296093908 | 0.189544078 |
| rs28539606 | kidney_stones               | 160784  | 1380904 | 1.64E-18  | 0.059560081 | 0.006752325 | 0.294397867 | 0.302421425 |
| rs28539606 | latex_allergy               | 39083   | 1044801 | 1.23E-07  | -0.07496873 | 0.014275331 | 0.300335116 | 0.283801268 |
| rs28539606 | leukemia                    | 4647    | 1614707 | 1.94E-06  | -0.20208341 | 0.043346002 | 0.295639636 | 0.267641228 |
| rs28539606 | leukemia_type_CLL           | 2188    | 1532831 | 3.05E-07  | -0.3112753  | 0.062836126 | 0.295221577 | 0.251961304 |
| rs28539606 | lichen_planus               | 9385    | 1625435 | 8.36E-49  | 0.372940318 | 0.02457351  | 0.295062293 | 0.361988809 |
| rs28539606 | metal_allergy               | 86097   | 372778  | 2.91E-07  | -0.05479334 | 0.010709468 | 0.292729522 | 0.283482697 |
| rs28539606 | milk_allergy                | 21790   | 1050137 | 7.81E-09  | -0.11037514 | 0.019329512 | 0.300236022 | 0.280678091 |
| rs28539606 | mold_allergy                | 166710  | 1009336 | 5.69E-48  | -0.10607708 | 0.007348952 | 0.300550238 | 0.280519297 |
| rs28539606 | no_allergies                | 969101  | 744269  | 7.18E-62  | 0.067046258 | 0.004045642 | 0.288079052 | 0.300652938 |
| rs28539606 | non_hodgkins_lymphoma_dx    | 15037   | 1602464 | 5.25E-09  | 0.130862554 | 0.022143962 | 0.295384073 | 0.316259432 |
| rs28539606 | other_animal_allergy        | 40280   | 1044775 | 1.22E-55  | -0.22020837 | 0.014320085 | 0.300312874 | 0.263488649 |
| rs28539606 | other_food_allergy          | 61878   | 1038378 | 7.96E-10  | -0.06758403 | 0.011064287 | 0.300310203 | 0.287666256 |
| rs28539606 | other_plant_allergy         | 61869   | 1038270 | 6.65E-11  | -0.07223893 | 0.011139227 | 0.300336586 | 0.28490033  |
| rs28539606 | peanut_allergy              | 11450   | 1053573 | 7.55E-07  | -0.1275076  | 0.026115319 | 0.300217752 | 0.278791857 |
| rs28539606 | peanut_allergy_broad        | 12128   | 1078943 | 1.00E-07  | -0.13399412 | 0.02550586  | 0.300222064 | 0.277861761 |
| rs28539606 | pediatric_ibd               | 5976    | 1602534 | 4.87E-07  | 0.173492736 | 0.033952655 | 0.295134548 | 0.325465949 |
| rs28539606 | plantar_warts               | 141186  | 219242  | 2.25E-06  | -0.04698396 | 0.009945214 | 0.296624666 | 0.288827198 |
| rs28539606 | pollen_allergy              | 254868  | 983756  | 1.62E-65  | -0.10361173 | 0.006103199 | 0.300741448 | 0.280731837 |
| rs28539606 | positive_tb_test            | 34228   | 531918  | 4.35E-12  | -0.12144193 | 0.017712799 | 0.295602182 | 0.282736983 |
| rs28539606 | rhinitis                    | 277227  | 953957  | 3.09E-74  | -0.10915657 | 0.006029672 | 0.300989339 | 0.280899065 |
| rs28539606 | rosacea_all                 | 131418  | 1511387 | 1.29E-29  | 0.087324592 | 0.007673784 | 0.294686479 | 0.305138582 |
| rs28539606 | rosacea_severity            | 251085  | NA      | 7.71E-07  | 0.108765157 | 0.022005719 | 0.294132802 | NA          |
| rs28539606 | rosacea_w_treatment         | 28689   | 1502486 | 5.49E-08  | 0.081154158 | 0.014824026 | 0.294828612 | 0.303052953 |
| rs28539606 | seasonal_allergies_broad    | 297070  | 971775  | 6.45E-64  | -0.09711361 | 0.005788429 | 0.300812857 | 0.282089036 |
| rs28539606 | severe_acne                 | 169557  | 1401733 | 3.47E-07  | 0.034458925 | 0.006744572 | 0.295114107 | 0.300243169 |
| rs28539606 | severe_asthma               | 5674    | 885481  | 1.98E-08  | -0.32679163 | 0.059341384 | 0.299463847 | 0.268959088 |
| rs28539606 | severe_asthma_new_experim   | 15584   | 882858  | 1.28E-13  | -0.1865517  | 0.025608226 | 0.299498314 | 0.271147654 |
| rs28539606 | squamous_cell_carcinoma     | 82062   | 1532976 | 1.86E-06  | 0.04871323  | 0.010178612 | 0.295689276 | 0.294086146 |
| rs28539606 | steroid_meds                | 260865  | 336193  | 2.24E-06  | -0.04134486 | 0.008742166 | 0.299214774 | 0.290250225 |
| rs28539606 | t1d                         | 12103   | 1634497 | 6.03E-93  | -0.55616013 | 0.028912826 | 0.296141325 | 0.218719249 |
| rs28539606 | took_meds_anti_tnf_alpha    | 23073   | 1635056 | 2.78E-11  | 0.119950057 | 0.017818661 | 0.295106382 | 0.312071009 |
| rs28539606 | tree_nuts_allergy           | 19641   | 1050517 | 6.79E-17  | -0.16619036 | 0.020238842 | 0.300321937 | 0.273338676 |
| rs28539606 | trees_allergy               | 181014  | 1004556 | 1.23E-44  | -0.09840175 | 0.00707285  | 0.30055607  | 0.281513426 |
| rs28539606 | ulcerative_colitis          | 27148   | 1603796 | 1.54E-29  | 0.185602727 | 0.016176271 | 0.295109513 | 0.325165179 |
| rs28539606 | urinary_tract_inf           | 124609  | 1358335 | 1.76E-07  | 0.039892724 | 0.007614469 | 0.294813861 | 0.298092189 |
| rs28539606 | weeds_allergy               | 192578  | 1001777 | 9.85E-56  | -0.10738257 | 0.006883065 | 0.300588165 | 0.279618957 |
| rs28539606 | wheat_allergy               | 17838   | 1051118 | 5.43E-10  | -0.1342254  | 0.021913912 | 0.30023869  | 0.276970105 |
| rs4251979  | acne_as_teenager            | 422542  | NA      | 9.17E-08  | -0.01214025 | 0.002272373 | 1.463673856 | NA          |
| rs4251979  | kidney_stones               | 160784  | 1380904 | 1.85E-17  | -0.03632218 | 0.004263173 | 1.465956533 | 1.451794946 |
| rs4251979  | severe_acne                 | 169557  | 1401733 | 1.64E-12  | -0.02953723 | 0.004175788 | 1.465554604 | 1.454211306 |
| rs4251979  | weight_qnorm                | 1689148 | NA      | 2.32E-06  | -0.00583657 | 0.001235574 | 1.464791787 | NA          |
| rs4933661  | bmi_qnorm                   | 1639524 | NA      | 2.16E-06  | 0.005512241 | 0.001163467 | 0.713077448 | NA          |
| rs4933661  | height                      | 1689909 | NA      | 1.64E-06  | -0.01467396 | 0.003060979 | 0.713061888 | NA          |
| rs4933661  | urinary_tract_inf           | 124609  | 1358335 | 5.40E-07  | -0.02303204 | 0.004599637 | 0.713501452 | 0.703667048 |
| rs4933661  | vaginal_inf                 | 38935   | 851776  | 5.71E-09  | 0.045383434 | 0.007777047 | 0.710351975 | 0.729779698 |
| rs4933661  | yeast_infections            | 345141  | NA      | 4.45E-31  | 0.031820247 | 0.002744468 | 0.708180762 | NA          |
| rs681343   | anemia                      | 238175  | 1262531 | 1.18E-23  | 0.03334549  | 0.003326048 | 0.965358409 | 0.986341353 |
| rs681343   | any_cvd                     | 563775  | 1080042 | 2.38E-10  | 0.016496325 | 0.002604138 | 0.964246542 | 0.97448385  |
| rs681343   | basal_cell_carcinoma        | 155625  | 1455757 | 1.16E-06  | -0.01961332 | 0.004034549 | 0.966901172 | 0.97585481  |
| rs681343   | bladder_cancer_dx_or_fh     | 18095   | 1651577 | 3.41E-12  | -0.07453315 | 0.010716656 | 0.968081184 | 0.931970732 |
| rs681343   | bladder_cancer_fh           | 12313   | 398422  | 8.12E-08  | -0.07033367 | 0.013119672 | 0.969545518 | 0.934934065 |
| rs681343   | blood_clots                 | 55282   | 1571038 | 4.57E-08  | 0.033878702 | 0.006196268 | 0.967356996 | 0.9861764   |
| rs681343   | bmi                         | 1639771 | NA      | 1.87E-12  | -0.04567854 | 0.006485105 | 0.967884416 | NA          |
| rs681343   | bmi_qnorm                   | 1639524 | NA      | 6.54E-15  | -0.00856162 | 0.001098619 | 0.967895396 | NA          |
| rs681343   | body_type                   | 150069  | 288327  | 2.11E-08  | -0.0282838  | 0.005048333 | 0.976936996 | 0.961643419 |
| rs681343   | cavities_many               | 303738  | 96113   | 8.41E-10  | 0.035424625 | 0.005773112 | 0.959596296 | 0.975200714 |

|          |                                |         |         |           |             |             |             |             |
|----------|--------------------------------|---------|---------|-----------|-------------|-------------|-------------|-------------|
| rs681343 | chronic_constipation           | 57697   | 633137  | 1.03E-06  | 0.030591821 | 0.006261617 | 0.968380326 | 0.989266327 |
| rs681343 | chronotype                     | 1619437 | NA      | 4.29E-25  | -0.00958722 | 0.000926493 | 0.968077851 | NA          |
| rs681343 | cold_sores                     | 233604  | 307800  | 3.21E-08  | 0.021835237 | 0.003948842 | 0.965733725 | 0.976824033 |
| rs681343 | cold_vs_hot                    | 138740  | 153365  | 1.30E-06  | 0.026735055 | 0.005524038 | 0.965483926 | 0.97384837  |
| rs681343 | colds_last_year                | 579912  | NA      | 1.10E-64  | -0.02069637 | 0.001218516 | 0.970950926 | NA          |
| rs681343 | colon_polyps                   | 269006  | 1284532 | 1.69E-13  | 0.024075176 | 0.003266082 | 0.96555907  | 0.98159871  |
| rs681343 | crohns                         | 17023   | 1613571 | 9.25E-16  | 0.088024148 | 0.010953254 | 0.96755933  | 1.009707973 |
| rs681343 | crohns_or_ulcerative_colitis   | 40358   | 1588350 | 1.99E-08  | 0.040262465 | 0.007172784 | 0.967481846 | 0.986557384 |
| rs681343 | crohns_or_ulcerative_colitis_v | 54554   | 1573157 | 6.83E-07  | 0.030813118 | 0.006203906 | 0.967437825 | 0.9818113   |
| rs681343 | crohns_w_fistula_or_stricture  | 4758    | 1618267 | 5.59E-07  | 0.103218714 | 0.020625652 | 0.967621445 | 1.016705816 |
| rs681343 | deep_vein_thrombosis           | 32216   | 1637272 | 3.45E-08  | 0.044350573 | 0.008038598 | 0.967487126 | 0.990319883 |
| rs681343 | deep_vein_thrombosis_w_prc     | 48840   | 1564319 | 8.68E-11  | 0.042664144 | 0.006575077 | 0.967286781 | 0.990879464 |
| rs681343 | gallstones_or_gall_bladder_re  | 72915   | 544299  | 2.74E-26  | 0.061342453 | 0.005783139 | 0.966776429 | 1.003231596 |
| rs681343 | hashimotos                     | 59604   | 1478372 | 1.10E-13  | 0.044622121 | 0.00600639  | 0.967503954 | 0.98956174  |
| rs681343 | healthy_old                    | 116163  | 1084694 | 2.28E-28  | -0.04862247 | 0.004403015 | 0.97467368  | 0.950643644 |
| rs681343 | heart_metabolic_disease_60     | 527510  | 162245  | 6.63E-38  | 0.052796573 | 0.004103497 | 0.951936842 | 0.975998225 |
| rs681343 | heart_metabolic_disease_70     | 284187  | 56447   | 2.01E-12  | 0.046369825 | 0.006594243 | 0.951067517 | 0.971805703 |
| rs681343 | heart_metabolic_disease_burr   | 1611466 | NA      | 9.56E-24  | 0.010822014 | 0.001077231 | 0.968293188 | NA          |
| rs681343 | height                         | 1689909 | NA      | 1.04E-15  | -0.0231893  | 0.00289049  | 0.9678623   | NA          |
| rs681343 | height_qnorm                   | 1689296 | NA      | 2.72E-16  | -0.0088882  | 0.001085863 | 0.967900057 | NA          |
| rs681343 | hemorrhoids                    | 232143  | 343553  | 8.20E-07  | 0.019600162 | 0.003975244 | 0.966462561 | 0.977067751 |
| rs681343 | high_blood_pressure            | 493911  | 1131414 | 1.48E-11  | 0.018301951 | 0.002711568 | 0.964608492 | 0.975690414 |
| rs681343 | high_chol                      | 192074  | 704263  | 8.48E-101 | 0.078504294 | 0.003683909 | 0.962121071 | 0.999884722 |
| rs681343 | high_cholesterol_broad         | 629368  | 1349088 | 2.12E-100 | 0.050426414 | 0.002370887 | 0.959688112 | 0.984595366 |
| rs681343 | high_ldl                       | 126387  | 478790  | 7.40E-31  | 0.052159536 | 0.004516119 | 0.962535356 | 0.988458606 |
| rs681343 | high_tg                        | 116217  | 363466  | 2.84E-25  | 0.050337613 | 0.004846275 | 0.963467061 | 0.991642484 |
| rs681343 | HIP_anemia_cause_deficiency    | 136240  | 1378915 | 1.45E-13  | 0.030647572 | 0.004145814 | 0.966731054 | 0.987220122 |
| rs681343 | hp_alcohol_2wks                | 1588481 | NA      | 4.92E-32  | 0.021911748 | 0.001859964 | 0.967928855 | NA          |
| rs681343 | hp_diet_quality                | 1552459 | NA      | 2.40E-08  | 0.008790457 | 0.001575188 | 0.968229436 | NA          |
| rs681343 | hypothyroidism                 | 186956  | 1348462 | 1.69E-10  | 0.023378608 | 0.003660075 | 0.96640235  | 0.980604754 |
| rs681343 | iqb.bedwetting_frequency       | 547585  | NA      | 1.54E-06  | -0.01020391 | 0.00212304  | 0.970396053 | NA          |
| rs681343 | iqb.childhood_ear_infections   | 214809  | 322672  | 1.51E-143 | -0.10171627 | 0.003990249 | 0.988257038 | 0.94031676  |
| rs681343 | iqb.chocolate_frequency        | 354646  | NA      | 4.22E-23  | -0.0189353  | 0.001912811 | 0.970852278 | NA          |
| rs681343 | iqb.dry_skin_frequency         | 531135  | NA      | 4.64E-11  | 0.013802481 | 0.002097022 | 0.971621416 | NA          |
| rs681343 | iqb.fresh_cantaloupe_yummy     | 342970  | 71887   | 2.26E-06  | 0.028159699 | 0.005955745 | 0.966042549 | 0.973577132 |
| rs681343 | iqb.gallstones                 | 72043   | 535026  | 1.63E-26  | 0.061979635 | 0.005816563 | 0.966854699 | 1.003269571 |
| rs681343 | iqb.influenza_last_12mo        | 124771  | 502056  | 4.58E-17  | -0.03796775 | 0.004522565 | 0.972253641 | 0.952122144 |
| rs681343 | iqb.licorice                   | 186346  | 226828  | 1.28E-22  | 0.045125651 | 0.004611505 | 0.965073685 | 0.981105816 |
| rs681343 | iqb.liking_sweets              | 338025  | NA      | 4.16E-61  | 0.050446089 | 0.003058187 | 0.971530048 | NA          |
| rs681343 | iqb.low_hdl                    | 117106  | 426358  | 2.07E-07  | 0.025035754 | 0.004821398 | 0.967574774 | 0.981479428 |
| rs681343 | iqb.norovirus_ever             | 140051  | 334786  | 0         | -0.18940865 | 0.004602112 | 0.993444759 | 0.905728257 |
| rs681343 | iqb.pastry_frequency           | 378933  | NA      | 1.35E-16  | 0.021599295 | 0.002611914 | 0.971688145 | NA          |
| rs681343 | iqb.spit_frequency             | 360235  | NA      | 1.55E-83  | -0.1063459  | 0.005490603 | 0.971783448 | NA          |
| rs681343 | iqb.whooping_cough             | 45580   | 459379  | 4.92E-09  | 0.041708982 | 0.007129505 | 0.96811482  | 0.992368093 |
| rs681343 | juvenile_asthma                | 112441  | 855660  | 2.05E-09  | -0.02763488 | 0.004611323 | 0.968170675 | 0.964054886 |
| rs681343 | juvenile_t1d                   | 4440    | 1637886 | 3.83E-07  | 0.108459355 | 0.02136694  | 0.967762233 | 1.025588235 |
| rs681343 | kidney_stones                  | 160784  | 1380904 | 1.79E-15  | 0.03010717  | 0.003784461 | 0.966520384 | 0.984956173 |
| rs681343 | measles                        | 291667  | 391515  | 1.76E-14  | 0.040717993 | 0.005311241 | 0.963711885 | 0.976954147 |
| rs681343 | morning_person                 | 629476  | 598088  | 1.42E-24  | -0.02732676 | 0.002670683 | 0.975008598 | 0.961749945 |
| rs681343 | motionsick_combined            | 424001  | NA      | 1.68E-06  | -0.00942894 | 0.0019689   | 0.970255427 | NA          |
| rs681343 | mumps                          | 194400  | 341700  | 0         | 0.227220278 | 0.005241474 | 0.944914542 | 1.022451279 |
| rs681343 | number_of_cavities             | 400874  | NA      | 4.80E-08  | 0.006447697 | 0.001181192 | 0.971617741 | NA          |
| rs681343 | pancreatitis                   | 19603   | 1438859 | 1.59E-10  | 0.065519289 | 0.010242228 | 0.967834495 | 1.000531786 |
| rs681343 | pediatric_ibd                  | 5976    | 1602534 | 4.79E-07  | 0.092799322 | 0.018432426 | 0.967614857 | 1.008159435 |
| rs681343 | psoriasis                      | 87077   | 1520979 | 4.40E-21  | 0.046756602 | 0.004961912 | 0.966756529 | 0.993887422 |
| rs681343 | psoriasis_plaque               | 11319   | 1551983 | 7.38E-07  | 0.066404211 | 0.013411846 | 0.966973085 | 1.005789494 |
| rs681343 | psoriasis_plaque_severe        | 9163    | 1605675 | 2.63E-09  | 0.088666722 | 0.014895699 | 0.966821034 | 1.019644221 |
| rs681343 | red_meat_servings              | 1598641 | NA      | 1.32E-34  | -0.01427441 | 0.001163382 | 0.968117875 | NA          |
| rs681343 | rosacea_severity               | 251085  | NA      | 2.28E-06  | 0.052599658 | 0.011128703 | 0.970071333 | NA          |
| rs681343 | salty_tooth                    | 259764  | 457263  | 1.04E-109 | -0.07788799 | 0.003501763 | 0.982283029 | 0.946337604 |
| rs681343 | stroke_w_proxy                 | 32946   | 1602476 | 5.65E-08  | 0.043341022 | 0.007982183 | 0.967420221 | 0.994753069 |
| rs681343 | sweet_tooth                    | 184479  | 533386  | 2.42E-56  | 0.060901199 | 0.003851021 | 0.962992781 | 0.99323135  |

|             |                              |         |         |           |             |             |             |             |
|-------------|------------------------------|---------|---------|-----------|-------------|-------------|-------------|-------------|
| rs681343    | sweet_v_salty                | 175626  | 251096  | 1.13E-113 | 0.100678716 | 0.004445593 | 0.945881969 | 0.993776599 |
| rs681343    | t1d                          | 12103   | 1634497 | 4.50E-10  | 0.080874929 | 0.012970167 | 0.967731368 | 1.012100387 |
| rs681343    | took_meds_anti_tnf_alpha     | 23073   | 1635056 | 1.80E-07  | 0.049212148 | 0.009428364 | 0.967463558 | 0.995398888 |
| rs681343    | ulcer                        | 73643   | 1431667 | 1.36E-08  | 0.030693157 | 0.005404586 | 0.967547483 | 0.982572564 |
| rs681343    | vaginal_inf                  | 38935   | 851776  | 5.89E-11  | 0.048310107 | 0.007379079 | 0.968165131 | 0.994481904 |
| rs681343    | vegetable_servings           | 1562427 | NA      | 7.55E-08  | -0.00490863 | 0.000912811 | 0.96829513  | NA          |
| rs681343    | weight                       | 1689226 | NA      | 1.49E-21  | -0.41227105 | 0.043233437 | 0.967876322 | NA          |
| rs681343    | weight_qnorm                 | 1689148 | NA      | 8.27E-27  | -0.01161723 | 0.001083756 | 0.967877907 | NA          |
| rs681343    | yeast_infections             | 345141  | NA      | 1.20E-24  | 0.026537897 | 0.002589221 | 0.972832439 | NA          |
| rs73081554  | chronotype                   | 1619437 | NA      | 4.12E-10  | -0.01202634 | 0.001924365 | 0.135253231 | NA          |
| rs73081554  | hashimotos                   | 59604   | 1478372 | 8.54E-08  | 0.066322921 | 0.01228819  | 0.134925474 | 0.142497126 |
| rs73081554  | hypothyroidism               | 186956  | 1348462 | 1.16E-07  | 0.040128987 | 0.007545502 | 0.134400177 | 0.140104191 |
| rs73081554  | morning_person               | 629476  | 598088  | 1.22E-11  | -0.03768984 | 0.005560802 | 0.137589416 | 0.133174608 |
| rs7319964   | any_allergy                  | 648614  | 942179  | 1.88E-12  | 0.016426376 | 0.002332312 | 1.075128203 | 1.082857422 |
| rs7319964   | any_animal_allergy           | 166363  | 974178  | 3.15E-13  | 0.028215366 | 0.003872725 | 1.07526706  | 1.088686296 |
| rs7319964   | any_plant_allergy            | 255833  | 948996  | 1.93E-09  | 0.019541916 | 0.00325534  | 1.07524483  | 1.08488701  |
| rs7319964   | bmi                          | 1639771 | NA      | 1.07E-06  | -0.03191446 | 0.00654294  | 1.07812897  | NA          |
| rs7319964   | bmi_qnorm                    | 1639524 | NA      | 1.69E-06  | -0.00533766 | 0.001114882 | 1.078123123 | NA          |
| rs7319964   | cat_allergy                  | 158067  | 1011379 | 2.62E-13  | 0.02882427  | 0.003942826 | 1.075026797 | 1.088838299 |
| rs7319964   | chronotype                   | 1619437 | NA      | 1.13E-08  | 0.005338029 | 0.000934928 | 1.077712084 | NA          |
| rs7319964   | dog_allergy                  | 87809   | 1031313 | 1.96E-10  | 0.032511668 | 0.005110531 | 1.075160341 | 1.090683852 |
| rs7319964   | dust_mites_allergy           | 171964  | 1010371 | 9.74E-08  | 0.020367738 | 0.003821042 | 1.075333303 | 1.085044808 |
| rs7319964   | grasses_allergy              | 187557  | 1003033 | 2.28E-10  | 0.023259817 | 0.003668916 | 1.07513432  | 1.086451403 |
| rs7319964   | HIP_allergies                | 628721  | 923844  | 8.84E-12  | 0.016121306 | 0.002362481 | 1.075147891 | 1.082726651 |
| rs7319964   | iqb.nose_bleeds              | 30837   | 396423  | 1.44E-06  | 0.041029022 | 0.008517466 | 1.078174603 | 1.098008313 |
| rs7319964   | morning_person               | 629476  | 598088  | 1.74E-10  | 0.017197806 | 0.002694573 | 1.07346136  | 1.082626009 |
| rs7319964   | no_allergies                 | 969101  | 744269  | 4.20E-09  | -0.01316312 | 0.002240106 | 1.08135217  | 1.075096168 |
| rs7319964   | other_animal_allergy         | 40280   | 1044775 | 2.07E-08  | 0.041154119 | 0.007345591 | 1.075367019 | 1.094853105 |
| rs7319964   | pollen_allergy               | 254868  | 983756  | 4.58E-10  | 0.02023951  | 0.003247865 | 1.075072349 | 1.085054781 |
| rs7319964   | rhinitis                     | 277227  | 953957  | 9.84E-12  | 0.021514591 | 0.003160383 | 1.075233867 | 1.085579742 |
| rs7319964   | seasonal_allergies_broad     | 297070  | 971775  | 1.80E-08  | 0.017361049 | 0.003083761 | 1.075116037 | 1.08379462  |
| rs7319964   | trees_allergy                | 181014  | 1004556 | 1.41E-06  | 0.017974071 | 0.003726623 | 1.075107315 | 1.083972777 |
| rs7319964   | weeds_allergy                | 192578  | 1001777 | 2.45E-10  | 0.022948805 | 0.003626095 | 1.075215916 | 1.086447361 |
| rs758049676 | acne_as_teenager             | 422542  | NA      | 1.36E-124 | -0.04953033 | 0.00208561  | 0.857400748 | NA          |
| rs758049676 | allergic_asthma              | 104543  | 861684  | 2.00E-21  | -0.04678215 | 0.004926205 | 0.865842507 | 0.842372298 |
| rs758049676 | any_allergy                  | 648614  | 942179  | 3.46E-78  | -0.0450242  | 0.002405965 | 0.870778648 | 0.850436573 |
| rs758049676 | any_animal_allergy           | 166363  | 974178  | 1.50E-52  | -0.06099634 | 0.004002421 | 0.871546999 | 0.842509886 |
| rs758049676 | any_asthma                   | 206177  | 823992  | 5.19E-31  | -0.04252769 | 0.003674788 | 0.865932223 | 0.846086135 |
| rs758049676 | any_drug_allergy             | 133412  | 994232  | 9.99E-43  | -0.06062744 | 0.004429872 | 0.871706235 | 0.842041373 |
| rs758049676 | any_food_allergy             | 106711  | 1004984 | 1.13E-14  | -0.0373281  | 0.004836354 | 0.871136971 | 0.853179606 |
| rs758049676 | any_plant_allergy            | 255833  | 948996  | 3.40E-41  | -0.04516356 | 0.003361861 | 0.871712735 | 0.847895419 |
| rs758049676 | back_hair                    | 350599  | NA      | 3.41E-08  | 0.015166186 | 0.00274789  | 0.863335774 | NA          |
| rs758049676 | cat_allergy                  | 158067  | 1011379 | 8.08E-57  | -0.06467312 | 0.004076211 | 0.871573643 | 0.840958283 |
| rs758049676 | chronic_hives                | 137804  | 1404307 | 2.76E-13  | -0.03095667 | 0.004239741 | 0.86436357  | 0.85003923  |
| rs758049676 | current_asthma               | 49137   | 876625  | 1.40E-10  | -0.04441064 | 0.006928982 | 0.865644429 | 0.842405792 |
| rs758049676 | dog_allergy                  | 87809   | 1031313 | 9.18E-39  | -0.068723   | 0.005284992 | 0.871585071 | 0.839041319 |
| rs758049676 | dust_mites_allergy           | 171964  | 1010371 | 4.06E-38  | -0.05089922 | 0.0039466   | 0.871746207 | 0.848068333 |
| rs758049676 | dust_mites_allergy_clean     | 165833  | 253006  | 6.75E-19  | -0.04230099 | 0.0047656   | 0.865171897 | 0.848232191 |
| rs758049676 | eczema                       | 195491  | 1401188 | 1.18E-13  | -0.02665315 | 0.003594373 | 0.864464199 | 0.854508331 |
| rs758049676 | grasses_allergy              | 187557  | 1003033 | 2.00E-41  | -0.05104952 | 0.003789804 | 0.871691478 | 0.845519749 |
| rs758049676 | HIP_allergies                | 628721  | 923844  | 1.28E-69  | -0.04297781 | 0.002437506 | 0.870136848 | 0.850858889 |
| rs758049676 | insect_allergy               | 48437   | 1042831 | 3.75E-07  | -0.03525767 | 0.006943837 | 0.871467141 | 0.852334785 |
| rs758049676 | iqb.bruise_easily            | 200257  | 284323  | 9.24E-10  | 0.02852157  | 0.004658792 | 0.856956685 | 0.866459001 |
| rs758049676 | iqb.childhood_ear_infections | 214809  | 322672  | 1.23E-06  | -0.02003729 | 0.004131361 | 0.866020233 | 0.854764506 |
| rs758049676 | iqb.gray_amount              | 372689  | NA      | 2.18E-07  | -0.02012872 | 0.00388368  | 0.860587148 | NA          |
| rs758049676 | iqb.shampoo_type             | 587676  | NA      | 1.67E-24  | 0.012455631 | 0.001219118 | 0.861171297 | NA          |
| rs758049676 | iqb.stretch_marks            | 285414  | 404710  | 6.19E-18  | -0.03449146 | 0.003997774 | 0.868250791 | 0.852715    |
| rs758049676 | iqb.toenail_fungus           | 117094  | 399201  | 1.89E-06  | -0.02421003 | 0.005082129 | 0.862820075 | 0.852097883 |
| rs758049676 | juvenile_asthma              | 112441  | 855660  | 3.64E-33  | -0.05756209 | 0.004802798 | 0.865851301 | 0.839947983 |
| rs758049676 | juvenile_asthma_not_current  | 32778   | 881682  | 1.23E-10  | -0.05395572 | 0.008393608 | 0.865729074 | 0.840188391 |
| rs758049676 | latex_allergy                | 39083   | 1044801 | 4.28E-10  | -0.04825401 | 0.007736899 | 0.871428191 | 0.844704899 |
| rs758049676 | metal_allergy                | 86097   | 372778  | 6.35E-09  | -0.03459229 | 0.005959157 | 0.860469456 | 0.844038049 |

|             |                          |        |         |           |             |             |             |             |
|-------------|--------------------------|--------|---------|-----------|-------------|-------------|-------------|-------------|
| rs758049676 | milk_allergy             | 21790  | 1050137 | 2.11E-08  | -0.05709195 | 0.010203892 | 0.87131584  | 0.843683647 |
| rs758049676 | mold_allergy             | 166710 | 1009336 | 1.84E-31  | -0.04663006 | 0.003999176 | 0.871736891 | 0.847498916 |
| rs758049676 | mosquito_bit_more        | 196102 | 160624  | 1.68E-08  | 0.02901153  | 0.005142788 | 0.851970758 | 0.86891276  |
| rs758049676 | multiple_sclerosis       | 10472  | 1646247 | 7.34E-10  | -0.08964621 | 0.014591011 | 0.863582774 | 0.823635764 |
| rs758049676 | mycin_drug_allergy       | 19758  | 1050772 | 2.27E-06  | -0.05060463 | 0.01071551  | 0.871336376 | 0.845359265 |
| rs758049676 | no_allergies             | 969101 | 744269  | 4.59E-69  | 0.040565658 | 0.00230998  | 0.852705271 | 0.871500716 |
| rs758049676 | other_animal_allergy     | 40280  | 1044775 | 2.74E-18  | -0.06612738 | 0.007593255 | 0.871399573 | 0.838509436 |
| rs758049676 | other_food_allergy       | 61878  | 1038378 | 1.06E-08  | -0.03539192 | 0.006190189 | 0.871386476 | 0.854321129 |
| rs758049676 | other_plant_allergy      | 61869  | 1038270 | 2.71E-16  | -0.05044038 | 0.006168742 | 0.871455292 | 0.84501405  |
| rs758049676 | penicillin_allergy       | 87996  | 1031087 | 1.67E-32  | -0.06265616 | 0.0052848   | 0.871716979 | 0.841374038 |
| rs758049676 | pollen_allergy           | 254868 | 983756  | 1.29E-41  | -0.0452987  | 0.003354166 | 0.87174735  | 0.847835478 |
| rs758049676 | psoriasis                | 87077  | 1520979 | 2.93E-10  | 0.032461999 | 0.00514787  | 0.862590153 | 0.87956813  |
| rs758049676 | rhinitis                 | 277227 | 953957  | 5.64E-46  | -0.04642034 | 0.003263291 | 0.871911906 | 0.848259152 |
| rs758049676 | seasonal_allergies_broad | 297070 | 971775  | 6.77E-43  | -0.04369888 | 0.003184672 | 0.871729904 | 0.849012618 |
| rs758049676 | severe_acne              | 169557 | 1401733 | 5.32E-105 | -0.08406171 | 0.003869606 | 0.867236659 | 0.82941535  |
| rs758049676 | shellfish_allergy        | 24923  | 1049182 | 4.36E-07  | -0.04813247 | 0.009536901 | 0.871288491 | 0.849025037 |
| rs758049676 | steroid_meds             | 260865 | 336193  | 2.07E-06  | -0.01878798 | 0.003958286 | 0.867272706 | 0.857153572 |
| rs758049676 | stretch_marks_any        | 296832 | 400580  | 2.46E-17  | -0.03355917 | 0.003962828 | 0.868172502 | 0.852910016 |
| rs758049676 | sulfa_drug_allergy       | 55114  | 1039623 | 2.61E-25  | -0.06846644 | 0.006596199 | 0.871582307 | 0.837536752 |
| rs758049676 | t1d                      | 12103  | 1634497 | 6.65E-14  | -0.10159002 | 0.013593398 | 0.863657024 | 0.813985837 |
| rs758049676 | tonsillectomy            | 223231 | 395019  | 2.91E-17  | -0.03517711 | 0.004163966 | 0.86643624  | 0.852866089 |
| rs758049676 | tree_nuts_allergy        | 19641  | 1050517 | 9.84E-08  | -0.05704398 | 0.010717101 | 0.871312102 | 0.845943852 |
| rs758049676 | trees_allergy            | 181014 | 1004556 | 4.18E-35  | -0.04754794 | 0.003849218 | 0.871704867 | 0.846682452 |
| rs758049676 | weeds_allergy            | 192578 | 1001777 | 1.28E-41  | -0.05058872 | 0.003746386 | 0.87174763  | 0.844611478 |
